# Supplementary material for: Spring Is Coming: Genetic Analyses of the Bud Break Date Locus Reveal Candidate Genes From the Cold Perception Pathway to Dormancy Release in Apple (Malus × domestica Borkh.)
Source: Front Plant Sci. 2019 Mar 7;10:33. doi: 10.3389/fpls.2019.00033 (PMC6423911; doi:10.3389/fpls.2019.00033)
Supplement: Supplementary file 1 [file Presentation_1.zip]

Archive with 8 entries (8 files):
- Supplementary Materials/Supplementary Figure 1.PDF
- Supplementary Materials/Supplementary Figure 2.PDF
- Supplementary Materials/Supplementary Figure 3.PDF
- Supplementary Materials/Supplementary Figure 4.pdf
- Supplementary Materials/Supplementary Figure 5.pdf
- Supplementary Materials/Supplementary Figure 6.pdf
- Supplementary Materials/Supplementary Figures and Tables Captions.pdf
- Supplementary Materials/Supplementary Tables.xlsx
