# Supplementary material for: Spring Is Coming: Genetic Analyses of the Bud Break Date Locus Reveal Candidate Genes From the Cold Perception Pathway to Dormancy Release in Apple (Malus × domestica Borkh.)
Source: Front Plant Sci. 2019 Mar 7;10:33. doi: 10.3389/fpls.2019.00033 (PMC6423911; doi:10.3389/fpls.2019.00033)
Supplement: Supplementary file 1 [file Presentation_1.zip › Supplementary Materials/Supplementary Tables.xlsx]

## Sheet: Supp. Table 1
Supplementary Table 1. Temperature and rainfall records of Bento Gonçalves and Vacaria, from 2011 until 2017.
		Bento Gonçaçves					Vacaria
		Temperature (°C)			Rainfall		Temperature (°C)			Rainfall
Year	Month	Observed minimum	Mean	Observed maximum	Total (mm)	Number of days	Observed minimum	Mean	Observed maximum	Total (mm)	Number of days
2011	Jan	20.7	22.8	25.6	172	21	17.3	20.4	22.8	245	19
	Feb	18.6	21.6	24.6	214	21	16.3	19.8	22.1	197	20
	Mar	15.2	19.9	23.7	269	11	14	17.4	20.8	171	16
	Apr	13.7	17.8	21.6	148	15	12.1	15.9	19.4	139	22
	May	10	14.3	19.9	70	13	6.8	11.9	17.2	103	22
	Jun	3.6	11.6	19.6	181	15	1.3	9.5	16.5	203	20
	Jul	2.2	12.1	21.2	323	17	0.4	10.8	17.6	287	18
	Aug	3.9	13	21.8	243	19	2.1	11.2	18.9	305	21
	Sep	7.2	15	23.4	58	9	5.2	12.5	20	89	16
	Oct	12.6	17.5	22.8	100	12	10	15.6	19.9	141	16
	Nov	13.9	19.4	25.5	23	6	10.5	16.8	22	46	12
	Dec	14.3	20	26.3	138	14	12.3	17.6	24.1	84	16
	Annual values		17.1		1939	173		15		2010	218
2012	Jan	17.8	21.7	26.3	59	11	15.5	21.2	27.3	83	9
	Feb	18.9	23.3	27.2	219	14	19.3	24.1	28.3	23	12
	Mar	11.2	20.5	26.1	40	7	8.4	19.7	27	18	7
	Apr	8.4	17.3	23.4	74	12	5.8	18.4	25.3	29	15
	May	8.5	16.2	22.9	25	3	6.8	13.2	19.7	24	10
	Jun	1.5	13.2	21.5	54	11	0.7	11.3	17.3	148	17
	Jul	4.4	11.7	20.8	193	12	3.1	9.9	17.2	229	18
	Aug	6.1	17.3	22.9	56	7	6.6	14.4	18.9	36	7
	Sep	5.6	16	24.9	224	8	3.4	14.1	20.9	156	15
	Oct	13	18.8	24.3	151	14	11.4	16.7	22.5	141	14
	Nov	14.5	20.6	25.3	24	6	12.7	18.2	23.5	74	5
	Dec	15.7	22.9	29.8	217	16	15.7	20.7	26.3	177	19
	Annual values		18.3		1336	121		16.8		1138	148
2013	Jan	15.9	20.9	26	104	11	14.7	18.6	23	107	10
	Feb	16.1	21.2	27.7	106	15	14.5	19.1	24.1	147	23
	Mar	14.3	18.4	23.8	186	16	12.6	16.6	21.2	151	20
	Apr	10.7	17.7	22.7	107	8	8.5	15.2	19.7	66	10
	May	6.9	14.7	22.9	128	15	6.2	12.6	20.8	92	13
	Jun	9.3	13.1	16.7	142	25	6.3	11.6	15.2	166	25
	Jul	2.1	12.1	20.5	96	10	-0.3	10.2	16.7	51	13
	Aug	4.1	12	21	304	17	2.4	10.6	18.7	321	18
	Sep	6.7	15.4	25	183	13	5.6	13.4	21.7	211	13
	Oct	11.5	17	22.3	122	13	9.7	14.8	19.3	153	16
	Nov	14.7	20	23.9	243	13	12.8	17.6	21.7	103	12
	Dec	16.9	22.2	28.8	137	11	15.3	20.2	25.9	91	11
	Annual values		17.1		1858	167		15		1659	184
2014	Jan	17.8	23.5	28	88	14	16.6	21.1	25.4	185	17
	Feb	16.4	23	29.3	193	16	14.7	20.8	26.3	92	14
	Mar	12.9	20.1	25.1	195	17	11.3	17.7	22	192	22
	Apr	11	18.1	24.3	124	9	9.2	15.9	21.4	175	15
	May	7.1	14.4	20.2	158	19	5	12.4	18.4	211	21
	Jun	5.3	13.3	19.8	247	21	3.4	11.8	16.5	333	22
	Jul	5.5	13.5	21.8	136	13	3.9	11.3	18.9	84	14
	Aug	6.1	14.9	24.3	114	13	4.3	12.5	20	105	12
	Sep	10.9	16.7	23.8	220	20	10.1	14.9	20.7	255	19
	Oct	13.6	19	27.2	160	11	11.2	17.2	23.1	183	12
	Nov	15.4	20.5	24.8	114	13	13.3	18.1	21.9	147	14
	Dec	16.1	21.4	25.9	294	20	13.9	19.3	23.8	323	17
	Annual values		18.2		2043	186		16.1		2285	199
2015	Jan	17.6	22.3	27.3	135	18	15.2	20.2	24	116	19
	Feb	18.3	21.6	24.9	141	16	16.1	19.4	23.6	176	23
	Mar	15.4	20.9	24.8	56	10	13.4	18.4	21.2	175	19
	Apr	14.4	18.2	22.4	137	12	11	15.9	19.3	123	10
	May	10.2	15.7	21.9	116	15	8.2	13.4	18.6	137	13
	Jun	5.4	13.7	21	222	13	3.5	11.3	17.4	170	14
	Jul	6	13.7	20.1	239	18	4.6	12.1	17.9	359	21
	Aug	10.2	18.3	24.6	76	9	9.6	15.6	20.2	51	7
	Sep	5.8	15.3	24.7	248	17	4.7	14.3	22.7	248	17
	Oct	10.1	16.8	23.3	298	22	9.3	15.9	21.2	339	21
	Nov	12.7	18.4	22.8	141	18	13.3	17.2	21.6	150	22
	Dec	16.4	21.2	25	197	19	15.3	19.8	22.9	278	24
	Annual values		18.0		2006	187		16.1		2322	210
2016	Jan	19.1	22.8	26.8	115	12	15.8	20.5	23.7	211	15
	Feb	19.3	22.6	25.4	146	12	15.4	20.6	24	122	20
	Mar	16.5	19.6	25.2	243	17	14.4	17.8	22.4	128	18
	Apr	6	19.9	26.9	260	16	3.8	18.4	23.4	129	18
	May	6.3	12.6	17.5	60	14	4.6	11.5	15.8	73	16
	Jun	3	10	17.5	7	8	0.5	8	14.7	11	4
	Jul	3.9	12.8	20.1	192	8	1.4	10.7	16.3	203	10
	Aug	7	14.5	23.4	111	11	3.8	12.1	19.2	131	17
	Sep	9	14.2	21.8	84	8	6.8	12.5	18	68	11
	Oct	9.8	17.1	22.4	356	15	7.7	14.9	20.3	311	15
	Nov	9	18.6	24.5	104	10	8	16.9	21.3	63	11
	Dec	15.7	21.6	27	81	13	13.8	19.3	25.5	183	19
	Annual values		17.2		1759	144		15.3		1633	174
2017	Jan	17.2	22.2	26.1	147	19	14.9	20.2	23.3	202	17
	Feb	18.4	22.9	27	138	13	16.7	20.8	23.9	102	15
	Mar	14.8	20.3	25	250	11	13.4	18.1	22.5	71	20
	Apr	9.4	17.4	23	157	14	6.8	15.3	20.5	161	14
	May	12.3	16	22.5	313	20	9.8	14	19.3	255	23
	Jun	4.8	13.8	19	160	15	3.6	11.8	17	166	20
	Jul	1.9	14.5	21.2	29	4	0.4	11.7	18	11	7
	Aug	7.8	15.2	23.7	114	13	4.9	12.8	19.7	100	14
	Sep	13.5	19.1	25.5	107	12	11.8	17.2	21.3	120	11
	Oct	12.4	17.7	22.1	184	15	9.8	15.4	21.9	208	18
	Nov	13.6	18.2	25.3	162	14	12	16.3	21.3	157	16
	Dec	16.1	21.7	27	105	9	15.4	19.7	23.7	161	14
	Annual values		18.3		1866	159		16.1		1714	189

## Sheet: Supp. Table 2
Supplementary Table 2. Accumulated chill units according to North Carolina model (Shaltout and Unrath, 1983), modified by Ebert et al. (1986), for Bento Gonçalves (BG) and Vacaria (VC), RS, Brazil.
Month	2011		2012		2013		2014		2015		2016		2017
	BG	VC	BG	VC	BG	VC	BG	VC	BG	VC	BG	VC	BG	VC
Apr	-41	-25	65	54	-19	1	-71	29	0	-21	90	79	16	5
May	4	172	53	185	33	161	-58	175	25	109	262	310	-82	46
Jun	194	503	88	343	161	401	17	379	88	346	585	700	-58	234
Jul	354	705	355	675	246	634	41	609	125	533	718	922	-56	354
Aug	401	908	162	660	366	860	73	712	12	531	670	1068	-116	449
Sep	336	1010	34	662	424	982	-126	630	22	576	639	1166	-263	349
SHALTOUT, A. D. and UNRATH, C. R. (1983). Rest completion prediction model for ‘Starkrimson Delicious’ apples. J. Am. Soc. Hortic. Sci. 108, 957-961.
EBERT, A. et al. (1986). First experiences with chill units models is southern Brazil. Acta Horticulturae. 184, 89-96.

## Sheet: Supp Table 3
Supplementary Table 3. KASP marker sequences of the 182 new single nucleotide polymorphisms (SNPs) within the QTL interval on LG9. Polymorphisms are indicated in brackets.
	Position in contig	Position MalDom_1.0	Position GDDH13_1.1	REF alelle	ALT alelle	Sequence
drm_qtl_snprnt1	MDC000196.702:3562	9:289978	Chr09:176310	T	G	tAgctGTTcAaTAAACTATTATGCTTcTcGCATGCAgtATCtGAGTCTTGCCtATTTAAGGAATATGGA[K]GAGGTATgTGTCtTCTTGaTCcCCTTGACCAATCAcAGATCCGCTcaAAagcatcCcctTTtAtTAtgat
drm_qtl_snprnt2	MDC000196.702:4006	9:290422	Chr09:176755	T	C	gaTtccCcTTtcttTttattAgttttagGgttGGGTtTGGtAGAGAGGAAGTACAATCAGCTACACCCG[Y]CCTTGTGCCTtGTCAACTGGTTATCTTTyTTCCATTCAtTTAGyyAGTGCTTCAgGTGGAACTGCTtATG
drm_qtl_snprnt3	MDC000412.413:11416	9:745482	Chr17:26696022	C	T	TCTATAATTaGTGcATTAATGtGACtCACcCAAtAAAATAATTAAAAATTATTTGACATCACATTTTCT[Y]ATATGTCAATCCAtaTAtGATTGAtATATCGGTTGgAGCTTaCTCCTActTTCAAATTTgATTACATaGc
drm_qtl_snprnt4	MDC000412.413:21176	9:755242	Chr17:26705779	T	C	aaCgTTTcGGtttctAAcTgaGAcGaacTcactttATGAGTCTTACTTGAGGAaGgCCcacTtctcgga[Y]tCcAcCAtTtcAatcccaAcccagcTgaagaACttcaaccaAcccAgtCaTaCcAAtAttTCggccgAAg
drm_qtl_snprnt7	MDC000412.413:33616	9:767682	Chr17:26718216	C	T	ggGccttttcgaatcggggGccCtgTgcgGtggCaccttttgCAcacGccgacattaTTGCTATGCATA[Y]GGTGATAttTGTGGTTGATGCTGTTATGATTCATAACTAGGCAaTTTCCctTCATATTTCCTTTGGTTgT
drm_qtl_snprnt8	MDC000412.413:34721	9:768787	Chr17:26719321	C	T	tAatTctTaAtTactTacatgtTTTcatTTTaAtTTTATGATTTGATTGGCCCTTaCTTATATAAAcTT[Y]GAGCTCCATAATTGTTGGACCATTGATATGTTATGAGTGgTGAaTgGTGatTagtgaatgtgtgtaaaTA
drm_qtl_snprnt9	MDC000748.734:439	9:3718105	Chr09:3936823	A	T	aagTtwaatcatTaTTTctAgatTgtcaAtAaATaTttgatTATAtaAgAccTGGtATGACAATTTACA[W]TTTTCAATAgATAATTGTGTGAGATcTATAATAAGAcTCACAtTTCttTttaCtCAAcaAatTgtcaaat
drm_qtl_snprnt10	MDC000748.734:1928	9:3719594	Chr09:3935337	G	T	gGAGTmCAGAAGCCTmCAGGGGCTAGTTCCATCrAGGTGGACGACAAGGTyCGTGAGTTTACAGTTTTT[K]ATAAATTACACCCTAAATCCGACgAAGTATATTGGTTGATTGACAGACTTCGTCTGGACTTAAAGCAATT
drm_qtl_snprnt11	MDC001371.252:11042	9:3876955	Chr09:4276040	A	C	ACCGAAACCATATTTAGTCTCCCTTAAAACTTtAAAGCAGAAAGTTAAAGAACCACAGATTACATGATA[M]CTGTAAATCCTACAAAGCCAGAATCAGTGTAAATCAGTGTAACTTTATAAGAGATTTTATCGACCCGCTT
drm_qtl_snprnt12	MDC001371.254:13002	9:3771300	Chr09:4182815	A	C	ACcAtcccAcagTtgttcctaCactatCtcCctggTTTtgtcAagTtcaCCcGgtCtcaTTtatgtcCc[M]cccCCTTTCACATAACACtCATGACCTACCAccAAtgGTGgCCTCACACAAGACCTTCTCagcccCAgag
drm_qtl_snprnt13	MDC001371.254:26279	9:3784577	Chr09:4195952	T	C	TatgatcttgtarTgATcaATgATTGcTtGTgtAGTTGGagGtTTgAAGCTAATtTTCTttTgCTTCAt[Y]TaGTTcTTCCCaTtGAATGcAACCCAAAAGTTGCTGCTTTTTAgtTaaTgtcatctccccAtcaTAAaaG
drm_qtl_snprnt14	MDC001371.254:27452	9:3785750	Chr09:4196963	A	G	TATGGGAGGAAACATGAAGAGGAAGTGAAGGCAAaATGTCCTATAAAGTttGTAcCAAGAAGGCTTCCA[R]CAAAATCACCTAGCAaCCAAAgTcCtGAAGAGAGTAtGGTTATTCCtGAGAGGAAGAATGTgTCGGTGGT
drm_qtl_snprnt15	MDC001371.254:27478	9:3785776	Chr09:4196989	T	A	GAAGGCAAaATGTCCTATAAAGTttGTAcCAAGAAGGCTTCCAACAAAATCACCTAGCAaCCAAAgTcC[W]GAAGAGAGTAtGGTTATTCCtGAGAGGAAGAATGTgTCGGTGGTCAAGATcAAACCCTCGCCtGATTTGA
drm_qtl_snprnt18	MDC001371.254:27731	9:3786029	Chr09:4197242	G	A	TCAGCCAAGCCcAAATTGcCATCCTGTTTGAAAcCCCATGTCAACGCTGCatCTAAAACCATGAAgCAG[R]AAGTTTCATCCTCTctTGAtTCcTGTTCaAAACCCatTgTCTCTGcTGtGCCTAAAAcCATGAAGCAGGc
drm_qtl_snprnt19	MDC001371.254:27767	9:3786065	Chr09:4197278	A	C	CATGTCaacGCTGCatCTAAAAcCATGAAGCAgGAAGtTTCATCCTCTctTGATTCcTGTTCaAAACCC[M]tTGTCTCTGCTGtGCCTAAAAcCATGAAGCAGGcAGTTTCaCCATCTCCTGATAAaCTGGAAGTcTCTTC
drm_qtl_snprnt20	MDC001371.254:27768	9:3786066	Chr09:4197279	T	A	ATGTCaacGCTGCatCTAAAAcCATGAAGCAgGAAGtTTCATCCTCTctTGATTCcTGTTCaAAACCCa[W]TGTCTCTGCTGtGCCTAAAAcCATGAAGCAGGcAGTTTCaCCATCTCCTGATAAaCTGGAAGTcTCTTCA
drm_qtl_snprnt21	MDC001371.254:27852	9:3786150	Chr09:4197363	T	A	CTAAAACCATGAAGCAgGcAGTTTCACCATCTCCTGATAAACtGgAAGTCTCTTCAAAGAAGGGTTcAA[W]AGGACCTAAGGAAAAGAACTTgTTTGTAAAGCATGTCACTTCTTCGAAGCCCAAATCTTTGGCAgtGAAG
drm_qtl_snprnt22	MDC001371.254:28030	9:3786328	Chr09:4197541	G	A	TCTGAGAAACCGTGATTcATTGATAGTCCGAAGGACtGGGACCTCTTTCAAGATAAgATCTTCAgCTTT[R]AAGCAAGTGtCTTCTCcTGAATCTGCAGgAGGTTTTAAAGGCAAATCTAAcAGTgATGGCAAGATAGGCA
drm_qtl_snprnt23	MDC001371.254:28188	9:3786486	Chr09:4197699	T	C	TAGTGACtTTGAAgAaAGTATTGcCGTCCCCAAGAGCATCAcTGTcCCCCAAACCTTCTCTCAGGAGtG[Y]TGCAAtCTTAAAAGCACaGaAGAACAGGCCCGTGAACGTTGTGTCTCCTCTTAAGAACCAGAACAAGAtC
drm_qtl_snprnt24	MDC001371.254:28194	9:3786492	Chr09:4197705	T	G	CtTTGAAgAaAGTATTGcCGTCCCCAAGAGCATCAcTGTcCCCCAAACCTTCTCTCAGGAGtGTTGCAA[K]CTTAAAAGCACaGaAGAACAGGCCCGTGAACGTTGTGTCTCCTCTTAAGAACCAGAACAAGAtCAGgAAA
drm_qtl_snprnt25	MDC001371.254:28291	9:3786589	Chr09:4197802	A	G	GAACGTTGTGTCTCCTCTTAAGAACCAGAACAAGAtCAGgAAAGCTCAACCTAAGCAAGTCAAtgacaA[R]GAGGTACAgGAGAAGACCTTGTATGTCATcAAGGTTGAAACTGAGAAcAaCAAACCTCtGGAATCTGATC
drm_qtl_snprnt26	MDC001371.254:28903	9:3787201	Chr09:4198414	C	A	AGATGTTCAgGGAAAGAAAGATGAgAAgGGTTTGTTtAACAACGTGATCGAgGAGACAGCAAGTAAACT[M]GCTGAAACCAGGAAGAGTAAGGTCAAGGCcTTGGTTGGgGCTTTCGAAACAGTcATCTCACTaCAAGAGt
drm_qtl_snprnt27	MDC001371.254:28911	9:3787209	Chr09:4198422	C	T	AgGGAAAGAAAGATGAgAAgGGTTTGTTtAACAACGTGATCGAgGAGACAGCAAGTAAACTcGCTGAAA[Y]CAGGAAGAGTAAGGTCAAGGCcTTGGTTGGgGCTTTCGAAACAGTcATCTCACTaCAAGAGtgCAAGCCT
drm_qtl_snprnt28	MDC001371.254:28942	9:3787240	Chr09:4198453	G	T	CAACGTGATCGAgGAGACAGCAAGTAAACTcGCTGAAACCAGGAAGAGTAAGGTCAAGGCcTTGGTTGG[K]GCTTTCGAAACAGTcATCTCACTaCAAGAGtgCAAGCCTTCTGCAAAtGCtGTCGCTTGAGtTGGGAAAA
drm_qtl_snprnt29	MDC001371.254:29052	9:3787350	Chr09:4198563	A	G	CTGCAAAtGCtGTCGCTTGAGtTGGGAAAAGAAtAgTGGAGaataAaccagaGctTgtAACgcGagTta[R]acaagcttAtggatgtgcaaaActgTaaaggtAgattgcTTcagTtGgtgttAgaCgGccTcGAtgcaGA
drm_qtl_snprnt30	MDC001371.254:32906	9:3791204	Chr09:4202428	G	A	ACTGTGgAAGTGGtTagGCCgTTTCTTTTTCaaTTGTcCTTtAAATCAAATGTAGTCaCTGAACcAcGT[R]AcaGGATATGTACATaTATGcATatTggtcTgGTtTgtgcaataTaatTacaTatTTgttcgTGacttca
drm_qtl_snprnt31	MDC001371.254:32923	9:3791221	Chr09:4202445	T	A	GCCgTTTCTTTTTCaaTTGTcCTTtAAATCAAATGTAGTCaCTGAACcAcGTgAcaGGATATGTACATa[W]ATGcATatTggtcTgGTtTgtgcaataTaatTacaTatTTgttcgTGacttcaAtaaTtatcgaatcagC
drm_qtl_snprnt32	MDC001371.254:33126	9:3791424	Chr09:4202648	G	T	taaATTACGCATCACAGAGAGGgCggaaaatgATtaaaaCtCtttcCtgtaTtcgaTctgGGgTacatc[K]ggttTaagagTcgGatTAtgcaacctctTTAagagaAgATTagcaacGtaagGaTamgcgatcaATcTcg
drm_qtl_snprnt34	MDC001371.254:35571	9:3793869	Chr09:4205101	T	A	ACTcttCgtccCtcGgtgaaaaaCggcatcAagAagtcgataGGAAAATGCAGAAAATTTTgagcAaTA[W]aAggcTcacaGtTcTgaaaTgTcAgaaaAtcgGAgaaAaTaggaTgtcggaaAatcggggaaAcaTaatA
drm_qtl_snprnt35	MDC001371.254:37501	9:3795799	Chr09:4207027	G	T	CTGAATGCGAGTCATGACAGATTTTTCATGCTCCCACTGCTCAGcCAACTCGGATTGTTTTTCTTTTAA[K]AGAGaTAACTCAGCcTCAAGGCGGTTCAATCTCTCTTTTGAAGcTTTGTCCGTATCATTTGTAAGgGAcA
drm_qtl_snprnt36	MDC001371.254:38586	9:3796884	Chr09:4208105	A	G	ATTTTGCAACCAAcTTATCAGAACTGTGCTACTACaTTaCCCATAAtcAATTTATCAATAGCtGAGCAT[R]TGCACAAGGCgaTGcGGGGgcAGCACATATTACTGGTAGGAgGcATCAgaCTCAAgATAGAGCACACACC
drm_qtl_snprnt37	MDC001371.254:40341	9:3798639	Chr09:4209860	G	C	ATACCCTTCCatTTCCAGTcGAAGCaTCACAGCGCACGACGAAAGGCCTCGAATTCCGAccgagTCgCC[S]CArCCCaGTTCGGAACGcACCGTTCGGAGTCgAtTGCCtcGAAATtAAgGCCcGgAAGGAGTCGGgttGG
drm_qtl_snprnt38	MDC001371.254:40582	9:3798880	Chr09:4210101	G	A	agcGAaCGAGGcCGCCGACGCCATTGgAGGAGCTcGAAGAAAAGGTTGtGATTGtTGTGGGAGCGTTGT[R]GGAAGTGGGtattGGaTaTGCAGAGGAGGAArgGGAGGTTGCTTTGAAAcGGTGGGAGGAaGgAaGAaGg
drm_qtl_snprnt39	MDC001494.456:21931	9:445797	Chr09:397542	C	T	TAGGAGTTGTcGCCaaatCTTGTAAAGAatTGCAGGAATTGAGAGTTTTTCCTTCTGATCCATTTGCAG[Y]TGGGCATGCTTCtGTAACAGAAGAAGGCCTTGTTGCCATATCTgcTGGTTGCCCAAAgCTTCATTCGTTG
drm_qtl_snprnt40	MDC001494.456:21944	9:445810	Chr09:397555	T	C	CaaatCTTGTAAAGAatTGCAGGAATTGAGAGTTTTTCCTTCTGATCCATTTGCAGcTGGGCATGCTTC[Y]GTAACAGAAGAAGGCCTTGTTGCCATATCTgcTGGTTGCCCAAAgCTTCATTCGTTGCTCTACTTCTGCC
drm_qtl_snprnt42	MDC003038.461:16189	9:499618	Chr09:456051	T	C	CTcGAATCGGACTAGAgcGAgAGGCCACTTCAGAAACATTTGATACTGGTTTGAGGTTTGATAGGgAAA[Y]TGGCGTCAATGGAGGTGAAGCAACTTCTTCAGCCTTGCCTGGAACTTGAGGAGACTCCAAATGTCTTGcT
drm_qtl_snprnt43	MDC003732.207:10795	9:1076095	Chr10:28295847	G	C	CCGTTGTGAAACCTCTCTTGCAAAAtACACACTCGTAcGACCGCCCTGTGCCCATGTCATCGTTCgCAT[S]CgGTtGatGaTCAGCcTCTTCATCAGTACTgGAGGTCTTTGAATCTTGATGATCCtGATGGTTGGAcTtC
drm_qtl_snprnt44	MDC003853.270:5751	9:12286	Chr07:3239766	A	T	GTTTTGGTGGTGTCACTAGTATCATTCTTGgTGGGAACtAAGAGGTACAGGAAaCAAAGGCgtCCAGGG[W]GCCCTTTaACTACGGTGGCACAAGTGCTCGTtGCAGCAGCTCGAAAATGcCATGTCACTaAaACACTCAA
drm_qtl_snprnt45	MDC003853.270:6957	9:13492	Chr07:3238561	C	A	AAGCTCGTCCTCCGACTCATCCCCCTATGGTTGAGTTtCCTAATGTTTGGtGTAgTCcAAGCCCAACTT[M]AtACCTTCTTCACCAAACAAAGTAGCACAACCATCCGgTCGATCgGTCCCCATTTCCAGGTTCCTGCGGC
drm_qtl_snprnt46	MDC003853.270:7466	9:14001	Chr07:3238052	C	T	GTCTATGAGTGTTaTAGGAGTTGGCAGCTTCATTAGCAATTGGATTATATCTGTTctGGAGTTAATTAC[Y]TCAAGAAATGGTGACAAATGGCTTGGTGACAATATCAATCGGGCTCACCTCGATTACTTCTATTGGGTGC
drm_qtl_snprnt47	MDC003853.270:11149	9:17684	Chr07:3234368	G	A	ccTagtGgAcAtttcgggTcggGGtrtGTcAAATttgtATtttgaaaTacccAatTaaraTtccAAcAA[R]GGTAAcGCTAaGAAAATTAAATTTGTAGAAAAATTTGCAAACTAAATaATgTGTCATCAATAgcAtTaAt
drm_qtl_snprnt48	MDC003853.270:11155	9:17690	Chr07:3234362	C	T	GgAcAtttcgggTcggGGtrtGTcAAATttgtATtttgaaaTacccAatTaaraTtccAAcAAGGGTAA[Y]GCTAaGAAAATTAAATTTGTAGAAAAATTTGCAAACTAAATaATgTGTCATCAATAgcAtTaAtCAtATt
drm_qtl_snprnt49	MDC004225.333:14344	9:192381	Chr09:59041	A	G	AGGTATTCAATTTTAGGGATTTAGGAAGAGTAACTTAGGGTTTTCTAGATTTTGGGattttgggTTATT[R]ATTTGTTGTTAgTGTATaAAGATAAAAATTGATTTGTTTTTATTGGGATTTTGGGTTATTGATTTGTTGT
drm_qtl_snprnt51	MDC004847.370:1704	9:3535090	Chr09:3732422	A	G	gCAGAGTTTGGcTCCACAGGCyCAAAGAAAGCCATCaGCAGTTTTCAGGCTTTCTTTTAAGAGGAGATC[R]TGTGATGCgGACGAAaCCATTGAACAATGTAAGTAAtCAAATACTTTatAtgtctTTgagtacaaAtaAA
drm_qtl_snprnt52	MDC004847.370:2097	9:3535483	Chr09:3732822	C	G	ttCrrtTTTTCTTTaaTCTAATGAGtATAcTATTTTCTGTTtgTCAGtGATAAACGgAAGTCACCTGCT[S]CAAAcTACAGTCCATATACTCCAATAGGTrTTGATtTATTTGTgTGCCCCAAGAAGATACAyCACATTGC
drm_qtl_snprnt53	MDC005354.182:9735	9:1627660	Chr09:1750476	A	G	aCaGtaggAGtAGGtcAGtggcattctGtaGAGTGGTCgGAAGCAGTcAGaTGCTTTGGcAAGGCTCGg[R]AAAGTTGGTTGTTGAAgTTCCTGCtGGTATgCtTATAACCATATACTTcCTgAatCctaaTaCatgTtta
drm_qtl_snprnt54	MDC005354.182:9740	9:1627665	Chr09:1750481	T	G	aggAGtAGGtcAGtggcattctGtaGAGTGGTCgGAAGCAGTcAGaTGCTTTGGcAAGGCTCGgAAAAG[K]TGGTTGTTGAAgTTCCTGCtGGTATgCtTATAACCATATACTTcCTgAatCctaaTaCatgTttatattg
drm_qtl_snprnt56	MDC005569.588:5559	9:3526423	Chr09:3716655	C	T	TTtgTTCTTGTTACTGCACGCTCTCTGAAGGTTGCTCAAACACTCaGACACCCCTCTcCCTTTCCCATT[Y]CCCGATCCGATTCTcAgCTTCAAgCACTCGGGAATCCCATTGAAkGCGTAGAGaGAAGCCGAAAacttcc
drm_qtl_snprnt58	MDC005569.608:5459	9:3511251	Chr09:3710189	C	T	csatggtctgaTGagAtAgggtatatGcagGATaAGAACCAGATTTGGAACATTGAcTAACTATAATTC[Y]GTTaCAACTGAAATgAACGAtAAAGTTGAcAGCAtcAGTGCasACATACCTCAGCCGGATAGGCTTTGAA
drm_qtl_snprnt59	MDC005569.608:6962	9:3512754	Chr09:3708686	G	A	ccCTTTAAACAGTTaCACAACGTcATGAAaTTGCAAAAAGCAACTAAAAATTAgTATGATTATTCTAGC[R]AGAgGAgaGATACATGCtAACgTGACaTATGTATTTTTACCTGTGCTGGAACAGCATCAGCAAGTATCCC
drm_qtl_snprnt60	MDC005569.608:7482	9:3513274	Chr09:3708166	C	T	aGTAAGGCCTTGCACaAtTACAACTGGAATGAGGAAcAGAAtTGTAAGAGCAGTATATGCAACCACtAC[Y]ACCAGCTTGGAGATCCATyTTTTtATAAAAGATGCAGAAAAGAAGGGCCAGTGAACATCCTGGGGCTCCG
drm_qtl_snprnt61	MDC005569.608:8183	9:3513975	Chr09:3707465	T	G	CCATAGTgaTCTAAAaCATCAACTTTGCGTCCAgAtAGCCCCCAAgAGCCaTCACGCCTTAATCTTTGC[K]GAGTATTAGTTTCTGATCTCAGaCGCAcgAGCTTTCgGTATAGcTTCCCcGCaTCACTCTACAAgGAAAA
drm_qtl_snprnt62	MDC005569.608:8191	9:3513983	Chr09:3707457	A	T	aTCTAAAaCATCAACTTTGCGTCCAgAtAGCCCCCAAgAGCCaTCACGCCTTAATCTTTGCTGAGTATT[W]GTTTCTGATCTCAGaCGCAcgAGCTTTCgGTATAGcTTCCCcGCaTCACTCTACAAgGAAAAGAAAATGA
drm_qtl_snprnt63	MDC005569.608:8205	9:3513997	Chr09:3707443	G	A	CTTTGCGTCCAgAtAGCCCCCAAgAGCCaTCACGCCTTAATCTTTGCTGAGTATTAGTTTCTGATCTCA[R]aCGCAcgAGCTTTCgGTATAGcTTCCCcGCaTCACTCTACAAgGAAAAGAAAATGAATTGTTCtCATATC
drm_qtl_snprnt64	MDC005591.388:7384	9:3968005	Chr09:4424801	C	G	GCGaCCGCAAACGGcGtTGTTcGAAGGCGGTCTCgGCCAAGCTGGAGACgCTaAAGAcCCTCGTTAATC[S]GACCCAcGTCGGaAAAtCGCTAAAAGCaGACGAATTGTTCCAGGAAACGGCGGATTACATCGTtCTGCTG
drm_qtl_snprnt66	MDC006556.374:9055	9:1636835	Chr09:1758184	T	G	aAAGCGTATAATTgCAGAGGATgGCCCAAACACCATGGATTCATtACCCAAGACgCCTTTTGATTCCAC[K]CGTAACATyCGGAGACCATCTCAAAAAGCACTGCGTACTCTATTTGTCAATGGCATcCCTCAGAAAAACA
drm_qtl_snprnt67	MDC006556.374:9112	9:1636892	Chr09:1758127	C	T	tTTTGATTCCACtCGTAACATyCGGAGACCATCTCAAAAAGCACTGCGTACTCTATTTGTCAATGGCAT[Y]CCTCAGAAAAACAACAAAAGGGAGGCTCTTCTTTCTCATTTTcAAAAATTTGGAGAGGTyATTGACATCT
drm_qtl_snprnt68	MDC006895.949:1502	9:3589485	NA	A	C	ATGGTCTTCCATGTCCGCATTGATTTgTTaTGGCGATGTTAGGGGTGACgCTCAACTTGGTTGATgCgT[M]tTCTgGTTGTATcCCCcTTCATCaCTgTGGTTTTCGTTGTGCCTTccTTGaTGTTTGCCTCTTCaTAGGC
drm_qtl_snprnt69	MDC006895.949:2327	9:3590310	NA	G	T	TTGCTTAaCAGAGAGTcGCATAACAACgCAAGACCAATTAACACAACAAgGCAAAAtAAAGGTTcATTT[K]GGAGAATTGGATACACATCGGGAAGATTGAAACtAAATGACAAAAATACATAAATCGAATTaATTGCCGa
drm_qtl_snprnt70	MDC006895.949:3361	9:3591344	NA	T	C	GtCgCAATTgGGTTTTGgAGAATTGAATTAATTTtGGATATTGGGGCGGATTTGTAATTTGAGATTACA[Y]cTAGGGGTGCAATTTGGGTTGGTCAACCCAAATTCATTCaTCCATTCAACTCAATTTCAtACCacATaag
drm_qtl_snprnt71	MDC006895.949:3367	9:3591350	NA	G	A	ATTgGGTTTTGgAGAATTGAATTAATTTtGGATATTGGGGCGGATTTGTAATTTGAGATTACAtcTAGG[R]GTGCAATTTGGGTTGGTCAACCCAAATTCATTCaTCCATTCAACTCAATTTCAtACCacATaagtTttGg
drm_qtl_snprnt73	MDC006895.949:8268	9:3596251	NA	C	T	GTCTGAGAAATCTgCAcTTTTCTTTCTTAATcGCTAACATGGCCTCAGAGCCAGGTTGGGTCTAAATTT[Y]TGGgCGTCGTGTtTGTTAGGGTTAAGCTCgGATTCACAGCAACAAGCTTATTGCAGTGATTCgAGCTCAT
drm_qtl_snprnt74	MDC006895.949:8281	9:3596264	NA	T	C	gcacTTTTCTTTCTTAATcGCTAACATGGCCTCAGAGCCAGGTTGGGTCTAAATTTcTGGgCGTCGTGT[Y]TGTTAGGGTTAAGCTCgGATTCACAGCAACAAGCTTATTGCAGTGATTCgAGCTCATATcTGcGATCGAG
drm_qtl_snprnt75	MDC006895.949:15994	9:3603977	NA	A	G	TGAaGATCCTAGGTCCTCACAACaAaAATCCgGATaGGATCCAAATCCAtaATATAAAGCTCTAAATTT[R]ATTTTCTATCCAGTAATATAACTGTTTTTCTTTCTTTCAATCTGGTAGCTTCATACCACAATTTGGTGAa
drm_qtl_snprnt76	MDC006895.949:17304	9:3605287	NA	T	A	AAAACGTACAtAAAtgTTGCGCGCTGGGTCTTTATTTCATCGTCACGGTCAAAcGGTTTGGTAGAAAAA[W]ATGAAACTTTGATACAATCATCTTGAAAGGCTCACGAACATCCTTcAaTTcGAATCACTCCAAAATTCAT
drm_qtl_snprnt78	MDC007111.1274:4161	9:129518	Chr09:30348748	G	A	GATGTCCCTGCAAACAGTGAAAAGGcCCTTCTTGCtGCAGTtGCTCATCAACCTGTTTCcGTTGCtATT[R]ATGCTAGTGGTTCCGACTTCCAGTTCTATTCAAGTGGTGTCTTTACCGGAACtTGTGGAACGAGCCTTGA
drm_qtl_snprnt79	MDC007111.1274:12198	9:137555	Chr09:30356799	A	G	cCATGTgAACATGACCTATGTCTTaTCAaCtATGTTCTGTGTAGAACtggATCAACCAGCAGcaaTGaA[R]GATGAcTATTTGGtACcAgAAtCAATGATGGCAsgTGTGAACgTTGAcGAGGTTgGgAAAtAGGGATtAA
drm_qtl_snprnt80	MDC007434.177:20617	9:881742	Chr09:797768	A	C	awACTCACCccgGATGCTTCATAcTTTGGCACAAtGAGCAAATGGCGAAGTCCCACTTGCCTGAAAAGa[M]CCATAGCTTTTGCCACwGACATGCCTTCCATaACTGTGTAaGGTGTTCTATTGGTGAGTGGATGCAGATC
drm_qtl_snprnt81	MDC007639.79:21462	9:3982801	Chr09:4443000	C	A	GACTtTACCaTGCAGAAaATGATatTTGAttTGaTgTTaAAAcTcAACAGCAgCCaGAAACTGGCACAA[M]GGGyTGTTTGCAACTCGGCACATGACCTCGAGCyGGAAGCATTCACCcTGAtACCCGAGgTTTTGCCAAT
drm_qtl_snprnt82	MDC007679.704:10055	9:1238613	Chr03:33200750	A	T	AATTCTTGGAATCTCAGTTATGCCCGCATCAACGAGGCCTTTAACTCCTtCTTTGGTTTCATCAAAAGC[W]TTTACTTCACTTTTCCGGTCGTAATTTGTGTTGGTAGCTACCATCTTTGTGTGcGACTGGATTTGTAAGA
drm_qtl_snprnt86	MDC009455.190:3382	9:209800	Chr00:40815187	C	G	AGGGTTGGTGTTAAAGCTGCCAAtGCTGCCGGAATGGAGGTAGTGGCTaTtCCATCCCGTGGTGAAGCT[S]CtGGTTcTTCcTCCCTTGCAGATACTGTGCTTCATTCTCTTTTGGAGTTTCAaCCtGAgCATTGGGGcCT
drm_qtl_snprnt87	MDC009455.190:3453	9:209871	Chr00:40815258	T	G	tGGTTcTTCcTCCCTTGCAGATACTGTGCTTCATTCTCTTTTGGAGTTTCAaCCtGAgCATTGGGGcCT[K]CCTCcAtTtGAgGACTGTACGtcTCTCACcTCtcATTGTTTGcaTGTATTTGTCCgtAGGGCCTTCCttC
drm_qtl_snprnt88	MDC009455.190:3985	9:210403	Chr00:40815790	G	A	ggGcTgtaGCTGTAGCTGATATGCAGAAGACCTACAGGGTAGTGGTTGgCATTGGATTGGAtcGCAAcA[R]TTCtCCTgATAAAAACATTGTGAGcAATCTaccTtaaAtTcTTaaTcAattTAgcTtcatctgtttatta
drm_qtl_snprnt89	MDC009455.190:4292	9:210710	Chr00:40816097	A	G	tgATGGAAACAATTGtTGTATATCCAATCAGCAAATGAAACTGCTACTTGTcGGCTACATCCGGGAATC[R]tATACaAAGGTAACaGCaTaTTTTcAAAGATgAAgTaAAACTGATGAAAGATAcTACAGGAAgTCATATA
drm_qtl_snprnt90	MDC009455.190:4517	9:210935	Chr00:40816322	A	G	aAaaaTgtaTgctCgTaaattaTctgTgcTtgatcgtcttctAagcaaAacgaCGCaTGTGTTGCAGGA[R]gTTTCATCaATsGATGCAGAAaCACTCGAGGAATGTAAGTcGATTgCAAGtGCTTCaCTCGATyTGCCAA
drm_qtl_snprnt91	MDC009477.96:8927	9:3732015	Chr09:4132173	A	G	ACgATAtATCTCTCACCAATTCTTTGaTCACGACTTATTCCaAGTGTGGGAAATTAAATATGGCtGCTA[R]TCTATTTgAGCATGCAGTTGAACGGTGTCTGACATCATGGAACACGAtGATCCTTGCATATGGGATGCAC
drm_qtl_snprnt93	MDC009477.96:15079	9:3738167	Chr09:4138321	G	C	gTGCTGGTCAcCGGAGAcTATTgACaACCGCTGGATCGCATCGGTaTGACATGTAtGATACTGATTTTG[S]ATGGGGAAGGCCAAGAGCACcGAAGTgGTTCGGATAaATAgAATtGGAAsAgTCACTTTTGCAGATGGCA
drm_qtl_snprnt94	MDC009561.723:4701	9:2987360	Chr09:3268870	A	T	GACaTGGTCGTGTcCTCCCACCGTGGTCACATCCTcCAaCCGCGGTCTTGTCCTCTCGTGGTAATACAt[W]ACACCGACGaCACCTATTTCCTCGAAGAAAAATTGTATCTGCTGTTCGTtATtTCCCACtGGGTTGCGGG
drm_qtl_snprnt95	MDC009662.63:24974	9:1709959	Chr09:1830915	C	A	GTACAAAACCTTATGTCCTTgATGTCCAATCCTCGAGCTGCAACaTCAGTTGCTACAAGAATTGGAGTC[M]TtCCAGAGCGAAATTGATTCAACACATAATCCCTCTCACTCTGAGATTTGTCGCCATGAATTGCAGCAGC
drm_qtl_snprnt96	MDC010403.411:27193	9:3350784	Chr16:38273732	T	G	TGGTAGAAATCTTGGTAACCaGATCCTGCGtTGGCTCGATCGGATGAAACCTGAAGCTGAGATTCGGgG[K]CCCtTGGACAAACCTCCCgCTGGTTCTAAcTCTAGCAcGAGTATTACAAAGCAGGTggACTCCTCCCAGC
drm_qtl_snprnt98	MDC010585.190:2632	9:3657183	NA	C	G	CACGCCAAGGCTGTGAaGAGAAaGATTGCCAATAGtGCGgCGAAGCAGAAGAAAACAATTTTACAAAGC[S]GTCCGGCGGAGGAAGACTTTGCCATTCCCATTCGATCcGTTAATTCACTATCCTATAcCtTatTctgcag
drm_qtl_snprnt99	MDC010585.190:2634	9:3657185	NA	T	C	CGCCAAGGCTGTGAaGAGAAaGATTGCCAATAGtGCGgCGAAGCAGAAGAAAACAATTTTACAAAGCCG[Y]CCGGCGGAGGAAGACTTTGCCATTCCCATTCGATCcGTTAATTCACTATCCTATACCTTATTCTGCAGAa
drm_qtl_snprnt100	MDC010618.271:4941	9:3522608	Chr09:3726276	C	G	cAtTcgGcTtTTCATATGAAgAATTgAACATAATTtTCTTtTGTTCTGCAAATTtTTgTAcTTTTTcTT[S]CAGCCAATGAtTcTGTtCTTaAAACTGaTTCTCTgTGTTTGtgtggagagtTTtatTtCcttGTTcaaaG
drm_qtl_snprnt101	MDC010618.271:4999	9:3522666	Chr09:3726218	T	G	taCtttTtcttCcagcCaatgAttctgTTCTtaAaacTgattctCtgTgtTTGTgtGgAGAGTTTTaTT[K]CCTTGTTCaAAGGAGTgTACATgATCGTATACaaTCtTaTAGAaTTCGATAaGgTAGTCTTtGAaTccTg
drm_qtl_snprnt102	MDC011348.216:5138	9:3874032	NA	G	A	tgCCgAAGAGTGCCATATCAGTAtCTGTAACCCACCGGCATCCCatGCTTGTCCAAGCGgCCAGAtCCC[R]GGTAgGCTTTATTTGCAAAGTTAGCGTGCAAGGCAGAcGTCCaTTGTGTAcTTGATCtCGACTCACCAAA
drm_qtl_snprnt103	MDC011348.216:5158	9:3874052	NA	G	A	GTAtCTGTAACCCACCGGCATCCCAtGCTTGTCCAAGCGgCCAGAtCCCGGGTAgGCTTTATTTGCAAA[R]TTAGCGTGCAAGGCAGAcGTCCaTTGTGTAcTTGATCtCGACTCACCAAAGCCaTGAATGGAGTgCCTCT
drm_qtl_snprnt104	MDC011348.216:5327	9:3874221	NA	T	C	CTCTGCTTCGGAGCACTAAGAGACCTcAACTTAGCCTTTGATGATTCAGTGCACGCCATGTAATTTGGG[Y]AATCGGAATAGCCgCTTAAGTAgCTTTTTGAGCCATCACcCtTTaTAGaAGTGAAGGGGCTTCTCTTcGA
drm_qtl_snprnt105	MDC011348.216:5409	9:3874303	NA	T	G	CgCTTAAGTAgCTTTTTGAGCCATCACcCtTTaTAGaAGTGAAGGGGCTTCTCTTcGAAGTAGCTCCCc[K]TGATGAAGCAGAATAaAACTGCGGACTACtGTTGGCAGTGCAGAAAGAGTCTTCCTCAACCTCTCGAGAG
drm_qtl_snprnt106	MDC011792.230:13574	9:1314690	Chr09:1282736	T	C	GGCCTTAGTCAAAATCATTTTAAGGTTTTCATGTTCCAATGCAGGTGAATATGAATTCCCGGAGCTTTT[Y]CTTAAGTCCAAAAATGGGGAGTGATCTTCTCCTTCAAGcTGCTGGTGACGAGGTGgGCAActtAaaagag
drm_qtl_snprnt107	MDC011792.230:13813	9:1314929	Chr09:1282498	C	A	CTTTTGTGCTcTTTTCTGCAGACTGGAGGTTATAGTGTTGCCAACTATATCtgGGACCTGATGGAAGcG[M]GTAAAATAGTTCCTCAATTCCTTTCcGTAGAAGCATATTAcaAGGGATTAAAAGTgAGTCTCTGGCCTTa
drm_qtl_snprnt108	MDC011792.230:13855	9:1314971	Chr09:1282456	A	C	AACTATATCtgGGACCTGATGGAAGcGcGTAAAATAGTTCCTCAATTCCTTTCcGTAGAAGCATATTAc[M]AGGGATTAAAAGTgAGTCTCTGGCCTTACGATGtAgTAATaaAAGTCCTAATAATCGGACTCcaTctttg
drm_qtl_snprnt109	MDC012008.164:2620	9:2822225	NA	A	G	TTCGTTTCGTTTGTGTCTAAGAAAAGAAACATTTgGAGTCTGAGGCATCCGCTTtTGTTGATTGACTAC[R]CGAAAATCGAGCTTGTAAAGCTATTCCATGTAAAGTCTCCATCAGTGTTGGAAtAGCTAACAAAAGGGCT
drm_qtl_snprnt110	MDC012126.338:6116	9:2795113	Chr09:3092037	A	T	tGTCCTAATCaCgGGkATCACAwCAGGgaAaGCTACCTCCTCGGCGATCAkAGCCAkCCTtGCcGCTCT[W]GCAACcAGTTTCCCaTAAAAaTAtGAAGAyGaaGTAGTTGATTsTGtaGAACTAAGAGCGTCAACgTCTC
drm_qtl_snprnt111	MDC012126.338:6583	9:2795580	Chr09:3092504	G	C	GATCCGGCATtACAGCAAaACGAAcAAcCCCAGAAAAgTCcTgAAGAGTTAACaTGGATGAGcCGCTGT[S]AGTtAATTCtGTTGGTGAGGATGTgTATAcTAGCCATGTcTGATCATTGTCGAGCTTGACGATGAACTTa
drm_qtl_snprnt112	MDC012126.338:8359	9:2797356	Chr09:3094280	T	C	GCGCCACTCgTGCTGGAtCAGGGCACTTGCtTTGCCAAAGTTGTTtACgCGTGCCTTAATGGaTGTCAa[Y]GGATCcAGGGCaTGCTGGGTGCCAAGAGTGATGGTATTCTCGTTGGTaGGAAACCTGTGgGTCACCTCaG
drm_qtl_snprnt113	MDC012126.338:8419	9:2797416	Chr09:3094340	G	A	GGaTGTCAaTGGATCcAGGGCaTGCTGGGTGCCAAGAGTGATGGTATTCTCGTTGGTaGGAAACCTGTG[R]GTCACCTCaGCGCCAACAGCTGTGTTGGAaAGGGGATTGACACTGTGATAGTAgGATGCACTGAGGATGT
drm_qtl_snprnt114	MDC012126.338:8647	9:2797644	Chr09:3094568	G	C	TCAAAtAAGCCAATCgTAGACAACCAAAAtAATACTTACAGGGTCAATGCAGCgAccAGATCAGCATTG[S]AGAAGCTCAgTCCAGCATTGCATTTAGTCAAAtTCCCGGTCTTGGTGTCgAATGACAGATCAGtACCAAG
drm_qtl_snprnt115	MDC012126.338:9589	9:2798586	Chr09:3095510	T	C	yGGaTCraGTtGAACaAAGAGTCrGTAAGAATGGTATGcGCAAGGcAmAtGgcaAtGGgcAtAagcgTa[Y]AgggaacacAtggaaaattataTgAaTcrcTTgtaaTAtcAgtgCtgCTcAtTaaaTTctAtgtttggct
drm_qtl_snprnt116	MDC012371.331:20243	9:2379962	Chr09:2499489	G	A	CCACAATGGGAATTGCAACACACATTGTCCGAATTGTTTGTCACCGATCAAgGGTGAACCAAAAGYGAT[R]CAAAGGGGACGTTTCACTTTCGATAAGTCGAGGCTTTCTAGCAGCCATAAGGTGAAAAGGGTAGCTACAG
drm_qtl_snprnt118	MDC013169.388:5971	9:3860407	NA	C	T	CATCtAgaACAAtcAgaAATTTCTTggCCaTCAATTGaTCTtTcAGTTtAACTTGAAGCAAATTCAgAT[Y]atTaATAccgCAAtccacTGAAGTGAaTGtCTcagaAAttGTTTTtGTtAtaCTcAcAaCATCAaAcTCT
drm_qtl_snprnt119	MDC013169.388:5978	9:3860414	NA	A	G	aACAAtcAgaAATTTCTTggCCaTCAATTGaTCTtTcAGTTtAACTTGAAGCAAATTCAgATCatTaAT[R]ccgCAAtccacTGAAGTGAaTGtCTcagaAAttGTTTTtGTtAtaCTcAcAaCATCAaAcTCTTtTGAcA
drm_qtl_snprnt120	MDC013169.388:6184	9:3860620	NA	C	G	GaGTGGTCTTcCCaATGCCtCCCATgCCCACcACCGGAATCACACagAtCTcATTtCtAcaaaCATCAc[S]AttcgatAgcAGCaatctAaTaaTggCCTctTtgTCcTCatccCgGccataAaCagaCTCTTCCACCAAA
drm_qtl_snprnt121	MDC013169.388:6187	9:3860623	NA	T	C	TGGTCTTcCCaATGCCtCCCATgCCCACcACCGGAATCACACagAtCTcATTtCtAcaaaCATCAcCAt[Y]cgatAgcAGCaatctAaTaaTggCCTctTtgTCcTCatccCgGccataAaCagaCTCTTCCACCAAAGAt
drm_qtl_snprnt122	MDC013169.388:6302	9:3860738	Chr17:4624462	C	G	AtaaacagactcttccAccAaaGATgtTgTaggTgaTcttCTcgaCgcaccatccTTcATaccttcTTt[S]AagccgagaacagacTTGctACTcactaTaaaTTCTAATCTTTCAAGAATCacccgtAtcttGtgtTcta
drm_qtl_snprnt123	MDC013169.388:6308	9:3860744	Chr17:4624468	G	A	agactcttccAccAaaGATgtTgTaggTgaTcttCTcgaCgcaccatccTTcATaccttcTTtcAagcc[R]agaacagacTTGctACTcactaTaaaTTCTAATCTTTCAAGAATCacccgtAtcttGtgtTctaAttcaT
drm_qtl_snprnt124	MDC013193.473:2038	9:3841725	Chr09:4229046	T	C	TGCCAACCGACCAGCGCGACCAAGAAGATCCACAATGCACGTGTAGTGATCAGTTTGAGGACTCACTTT[Y]GGGTCTTCAAGCATGAACCTGAAcAACCCCAAGCCCTCGTCCACCAAACCGGCATGGCTGCAAGCATGCA
drm_qtl_snprnt125	MDC013193.473:2704	9:3842391	Chr09:4229712	G	A	AACATCAGATTCAAGCTTTtGCCTAATAGCCCATGCGTGCAAGCACcGTCCATGCTTTGATAGATGCAA[R]CTCCCACAggctgaaagaagagaagctatagttacgaaattgggttttacaccttcccgctgcatcwgcc
drm_qtl_snprnt126	MDC013193.473:7576	9:3847263	Chr09:4234586	G	A	CgtaCTgCATCGATGtcACCGCCGAGTGGCGAAAgTTTGCgGATaAGgAtCCcaAgGAgGACCGGACTC[R]tGTCGGtActtCCTtgGrTCCtTTGCTGGATAATGGccTTCTTaCCACTTGTATtTcCAAAGAAAAGAAG
drm_qtl_snprnt127	MDC013193.473:7711	9:3847398	Chr09:4234721	C	A	AgaaGcAaaAcAAgAAcAAGgAcaAcAccGatGgTGttgTTcCTCCAtaTAaccggttGaatAACgttG[M]racGTCgAACCCCCAAAcGTCTCTCaCAAAAGCTACagAATACCTCGAAgCCATGGCTcaccacCTAGAC
drm_qtl_snprnt128	MDC013193.473:8395	9:3848082	Chr09:4235405	G	A	ggaggaccTcaAGAAatTgaAcagTcaTtgaAgGtctAGAtcAaAacattgtaaTtcatCAaActTAat[R]caCaAATCATAAATTgTTTAGTGAAGTTAGAGGTTGTGAAATGTGAGGTGAGcTCTTggTTTGGCCGGAA
drm_qtl_snprnt129	MDC013559.240:2836	9:3008773	Chr09:3312441	G	A	TGGgCTTCTGGATGAGAGCCAGAACAAGCTCGATTATGTGTTGGCTcTGACTGTGGAGAACTTTTTGGA[R]CGTCGTCTTCAAACCCTTGTGTTCAAAAgTGGTATGGCCAAGTCCATcCACCACGCCAGAGTTCTCATCA
drm_qtl_snprnt130	MDC013559.240:2999	9:3008936	Chr09:3312278	T	A	cAttgTtgctCaaAAcATGTtGTTTGTGTTATCTGTTTGTTACATATCTATActTGGCAGGtGaattTa[W]taAgGtaacaAtTTctgtactgtcatgGtTgatcTtctTgtTTctTaAtTTagttTcaAgtTgtTTTgaT
drm_qtl_snprnt131	MDC013559.240:3062	9:3008999	Chr09:3312215	G	T	aattTaTTaaggtaAcaAtttctgtacTgTCATGGTTGATCTTCTTGTTTcttAATtTAgTttcaagTt[K]tTtTgatTtgctaakGaTtgtyCcgtctTTtgTtaattaAccTTcAcatAtCcTaaccActcTcTTggTT
drm_qtl_snprnt132	MDC013559.240:8162	9:3014099	Chr09:3307148	A	C	CAgGAGCAGAGAgCCGAGGCCAGAGCCaGTcCCACCTCCtACaGCGTGGAACACCAGgAACCCTTGAAG[M]CCaGTgCAGTTgTCgGCAAGCTTTCGGATTCGATCAAGGCAGAGATCcACAATCTCCTTCCCAACTGTtc
drm_qtl_snprnt133	MDC013559.240:18135	9:3024072	Chr09:3297566	G	A	AAAGTGCTTATCGGATGTTAGTGGcAATATcGAATTCAAGGAAGTAACCTTCAGCTACCCTTCGAGaCC[R]GATGTTATTATCTTCCGAgATTTTTCgATCTTCTTTCCAGCCGGaAAGACgGTtGCcGTTGTTGGTGGcA
drm_qtl_snprnt134	MDC013559.240:21273	9:3027210	Chr09:3294462	G	A	atatgacayggtTtTgcggTGTgTttcCTTTgTtTtGTtgTtTttggggtTttgTAcaagtaatgaacc[R]gTCgaagGagagAAacTTTCCaacgccgtragagtTGtcAtgTrTTtTaacttttcgtttGAaggccAcc
drm_qtl_snprnt135	MDC013559.240:21523	9:3027460	Chr09:3294212	A	G	CTGTTTAATtCTGCAATTcTGCaTTATGCAGCAACTTTCTTTGAAGGGCTTTGCTGGAGACACAGCCAA[R]GCTCATGCAAAGACGAGCATGATTGCaGGGGAGGGAGTGAGCAAyATTCGGACAGTCGCCGCgTTCAATg
drm_qtl_snprnt136	MDC013559.240:30151	9:3036088	Chr09:3285658	A	G	TgtTGTGCAtATGTcAgCATATaTTGACATATGTTGAAGCAATCTaATgAGTGCTATcGAGAGAAtcat[R]TaAagtgatgCagaGatAtgccTaAcaaaCactatAtcaAacacTtGgtGtaggcACAaaAggaAtccac
drm_qtl_snprnt137	MDC013559.240:35071	9:3041008	Chr09:3280744	A	G	TAaTAATATgGGTTTCCCATTGACCCATATATTACTAAACAcTGTCTtGTTGGAGTTGGacCatctagt[R]gtaAAcCtTatcatgtgtcatgtgtTatgtgacatgtgaTatgtTtagAacTtgaaGaATtTaTAcgtTa
drm_qtl_snprnt138	MDC013559.240:40111	9:3046048	Chr09:3275726	C	T	ctcgTTcCGtCCCgtCtGCGTaCcaaACartacCCTAAGGaTCtAAACTTCAAGAACAAGGGCAAAGyT[Y]TCGTTCAaGCTGCTTtTACTGAACTGGACATGTGTTATCGcTaTGGATCAAGGGATCATTGGTCACGCrT
drm_qtl_snprnt139	MDC014161.287:4271	9:2901611	Chr09:3184636	C	T	AGTggATttTGGAAAgACACTTtAtATGCTTCCTGGAAAAAGCACATtAccacataTatggtgtttcat[Y]cAAaagAcactTTtgaaAttcaAaattaAtttcaccAgaAGgttttctattAtttAAAgTtcttctaaAc
drm_qtl_snprnt140	MDC014161.287:7175	9:2904515	Chr09:3181735	C	A	CGtTGgCaaTggatAtgcagTtaatattggATCCTTTTCCCCATTTAACcCtGgAaCcTCacTCtatgc[M]ttTtgTaTtacatgaaccTctcCAttaaaTAgCattatttaAACaTaaggTaatcaaacCaTaaTggTaa
drm_qtl_snprnt141	MDC014222.185:7028	9:3958053	Chr17:4697051	T	A	aACTTCAAGAAACAAATTTATGTCTTCgATTGTTCGCAAGTTtGATAgTgCTAGCTGGACACCTTCAGT[W]GTCCCTTTCCTGATGTGAGTTTAATCaTTGGTGTCAGTCTTGGAgTccATGTATTCTGGATGAGGGTGCT
drm_qtl_snprnt142	MDC015084.371:534	9:3874344	Chr17:4657736	A	G	agtctcctctTTGGAACTCTTGCCTTGATTTTAGAAGTGGTGATcCTTGTGCCAGGTTTAGGGaaAGTC[R]CCGGATTCTTcTGGGTTGGTTGGTTTGTGAAGGTTGTAGcTGAGTACGcCatCaAATACCTCAAAAcgtt
drm_qtl_snprnt143	MDC015084.371:601	9:3874411	Chr17:4657669	C	T	TCACCGGATTCTTcTGGGTTGGTTGGTTTGTGAAGGTTGTAGcTGAGTACGcCatCaAATACCTCAAAA[Y]GTTGTATGAAAgTGCAGTTGCATtAGTTGtTCATACATTTGGtAAATTGgAAGACTATgTGAAtATGATc
drm_qtl_snprnt144	MDC015084.371:2842	9:3876652	Chr17:4655429	A	G	cGTTACaTATATCAACCACcGCTTAACCGTGCACtTGGAAAACATGATACTCGTTGTCGTTATTTCACa[R]ACATGCrTGACCtTTAACGTCaTCTAcGTTaTTTCaTAAaTcatTgaTgaAggAActtggcacgaaacac
drm_qtl_snprnt145	MDC015186.67:8593	9:3544717	Chr09:3737725	T	C	AACTATGTTTAAACCgCAGcACActTACGAAAGTTCTCTTAgGGAGAGGTGTAAAGAaTTTCCAACTAC[Y]GCAgTAGACATGTTAGAGAATCTtCTTTCgGTrGAACCTTACAAaCGCGGGACTGtCTCCTCTGCCcTAA
drm_qtl_snprnt146	MDC015186.67:9432	9:3545556	Chr09:3736893	A	C	CCGcGArTCTAATCTAAAACCGCAATTTGATACAGTTTCGGAGAATTGCGAGTTGAATGCATCACtgGG[M]gAtAGTACATTGTCTTCCGTACAAACCTCAGCAGCAAGCGGtTTTGCATGGGCtAAAAGGGGAACtGAGG
drm_qtl_snprnt147	MDC015186.67:9571	9:3545695	Chr09:3736754	A	C	GATGGTACTcAATCcGCAGTTTCAGAcGGCTCGAAAAGtCAGTTCAGTGCaCTtGATGCAAAtTTCGCA[M]gGAGTACATaTGACCTAAAACAAGGAcAtAGAACTGGCAgGAtgGCtATACGAAAGCTTAGAACTTTCGA
drm_qtl_snprnt148	MDC015186.67:9679	9:3545803	Chr09:3736646	G	A	AgGAtgGCtATACGAAAGCTTAGAACTTTCGACgCGTCTGAACTgaCTAGTACAGaAGAGCCAGAtGAT[R]CcGGAAACaACAcGGTAAGaACAtAGAACaaAACCATCaTCTTTGAtACAGTTGATCCAAATGCTTTACg
drm_qtl_snprnt149	MDC015239.225:4685	9:1873565	Chr00:44324977	A	G	atATTTCAGGGATTACTTGGTCGCTTTGCTAATCTGGGCATTCGTGACAATACTGAArGTGGTAGCACA[R]GAGGCACTCAAGTTGTTGCACTgGCTTGCAAAATGGTTGGTGGaGGCAGCGATGGCTCcCTGGATCTCTg
drm_qtl_snprnt150	MDC015239.225:4708	9:1873588	Chr00:44325000	G	T	CTTTGCTAATCTGGGCATTCGTGACAATACTGAArGTGGTAGCACAaGAGGCACTCAAGTTGTTGCACT[K]GCTTGCAAAATGGTTGGTGGaGGCAGCGATGGCTCcCTGGATCTCTGCGCAAAGGTCTGCCTCACTGATg
drm_qtl_snprnt151	MDC015493.468:6377	9:3676441	NA	G	A	tttcagaAACTTGGTTCCATGGATTATATCTGGTTATGtCGAGAAGGGGCTgGtGAAGGAtGCGATtAT[R]tTgTATGATCAcATGGAGGAAGCTGGATTGAAGCtTGATAATGGTtCTaTTATTAGTATATTGGCttCTT
drm_qtl_snprnt152	MDC015493.468:7305	9:3677369	NA	G	T	tTctAaCATTACgGTTGCATGATTGACCTTTTGGGTCTTGGTGGGCGTCTTAGtGAGGCTTTTAGGCTT[K]cGCATAGCATGCCAATGGAACCAAATGCTGCTGTATGGGGTACAaTTTTGGGGGCTTGTCGGATGCATAA
drm_qtl_snprnt153	MDC015493.468:7524	9:3677588	NA	C	T	GTCAAATATTTATTCTGCAGCTGGTGATTGGGTCAATgTTGCCAaTgTGcGGCTGCAAATGAGGAGCAC[Y]GGAGTCCAGAAATTcCCCAGGGCTAGTTCcGaTGAGGTGGACGAcGAGGTCCATGAATTTACAGTTTTTG
drm_qtl_snprnt154	MDC015493.468:7539	9:3677603	NA	C	T	TGCAGCTGGTGATTGGGTCAATgTTGCCAaTgTGcGGCTGCAAATGAGGAGCACCGGAGTCCAGAAATT[Y]CCCAGGGCTAGTTCcGaTGAGGTGGACGAcGAGGTCCATGAATTTACAGTTTTTGATAAATTACATCCTA
drm_qtl_snprnt155	MDC015493.468:7793	9:3677857	NA	A	T	TTTATTTGGTGAGCATCAGCTtACTCAAACTTGTCcAGAAAaACTTCtGCGAGCCTCCtAATTGGAAAA[W]tTTCAAGGAGAAACTTCTGACCAATGTCCTtAGGACTTAGATTATAAACTTGTATACAgGTTGATAAATa
drm_qtl_snprnt156	MDC015493.468:7852	9:3677916	NA	G	T	aatTggaAAaatttcAAggagaAActtctgACcaaTgtCCttaGgaCTTAGATTATAAACTTGTATACa[K]GTTGATAAATAGAAGGGGATCAATCGTTTGATTTGTTGCTTATcTGTATCAGTAGATTGGAATTAACagt
drm_qtl_snprnt157	MDC015493.468:8183	9:3678247	NA	T	C	AAGTTGAAACTCAACCTTAAATTTCTTAATGAAATTATGTTTTCTtATAAACAATTGCACATCAAACTA[Y]TGTCTTGTaAGCTATATCGTTTAGCGAAgAAAAACTTACATGCAACtGtgGtaATatttCaagtcaAtcA
drm_qtl_snprnt158	MDC015493.468:9721	9:3679785	NA	G	A	AAACTCGTGTGATTTAGAATACGTAGGATCTAGtATGGTTGTAGAACgTAGAAAACAAAATATTATTAA[R]AAcATAgATAGAAAacACCTTGAAAATAAACTTGAATTGtCAAAAGCTCCTAAGTTAATGCGTCTCTCCA
drm_qtl_snprnt159	MDC015493.468:10070	9:3680134	NA	C	A	TCTTTTTAAAGCTTgAGACGTCCCTAACAAATCCTCAaAAaGAATcTTCCTCAAAATATGcCATCTTGA[M]CTTCAAAATACCCAAAACGTACAgAAAcaTTGCGCGCTGGGTCTTTATTTCATCGTCACGGTCAAAtGGT
drm_qtl_snprnt160	MDC015493.468:10094	9:3680158	NA	G	A	TAACAAATCCTCAAAaaGAATCTTCCTCAAAATATGCCATCTTGACCTTCAAAATACCCAAAACGTACA[R]AAACATTGCGCgcTGGGTCTTTATTTCATCGTCACGGTCAAATGGTTtGgTAGAAAAATATGAAACTTTG
drm_qtl_snprnt161	MDC015493.468:10465	9:3680529	NA	A	C	TaAAAgTTTTTATAAAAACAAATATTTCTAAAATTAAGGGcTAATATTTgGcTACATTCaATAAATACA[M]tgGTTGAGAtGATgGTGCGATATCAATGAAAAGTAGATTTGCGAACGATACCTAGCTAGAATCGCAAGAG
drm_qtl_snprnt162	MDC015493.468:10466	9:3680530	NA	T	A	aAAAgTTTTTATAAAAACAAATATTTCTAAAATTAAGGGcTAATATTTgGcTACATTCaATAAATACAa[W]gGTTGAGAtGATgGTGCGATATCAATGAAAAGTAGATTTGCGAACGATACCTAGCTAGAATCGCAAGAGG
drm_qtl_snprnt163	MDC015566.523:2096	9:930529	NA	C	T	GACGCAGATCTCACgCCCAACCACaCTCTtCgCCGCATAATCCAAGCTTGGTGCACTCTCAACTCTTCG[Y]ATGGCGTCGAGCtGATACCAACTCCtAaATcCgcGctcgAcaaAtCccaggtcGTgatgctcatcgAaca
drm_qtl_snprnt164	MDC015687.155:838	9:1127224	Chr09:1107923	A	C	ATGAATaTAGTAGTKCTTGGATTTCTTCGGCGAGAGCAAACATGAGAGCCATGGCATCCAGAGCTACTA[M]CCATCGTTTTACCCGACATATGTMGTMGTYTAGCTTCTCTTTCGGTTTCAAAAYTTCCATTTCCGGTGAC
drm_qtl_snprnt165	MDC015724.144:3362	9:3732287	Chr02:11855220	C	T	cttGaTgActTGCACGTTAAAAAgTCAAGGGTCCAGAAAAaCTtCAAAAcGATAAATAAgAAATTATGT[Y]CATATCATATAAcGTgGTAAGGAAAGAAGCAAtGCAAAACAGTCTCTAAGAACCAAGTTgGCATCCAAAG
drm_qtl_snprnt167	MDC016342.173:2295	9:3371231	Chr16:38229474	G	A	AtACaTTGAGTGTTCTTTCTTTCTCTTACCTATCAATTTCGCTGCATTACATTCTTCTTTGTGAGATAA[R]CgTCTCCAAAGTAGTGAAGTCTTTTTAAcCCCCAACAgtCCcCaatcatAGcaGgaccTcCacAatcagg
drm_qtl_snprnt168	MDC016342.173:2302	9:3371238	Chr16:38229481	C	T	GAGTGTTCTTTCTTTCTCTTACCTATCAATTTCGCTGCATTACATTCTTCTTTGTGAGATAAgCgTCTC[Y]AAAGTAGTGAAGTCTTTTTAAcCCCCAACAgtCCcCaatcatAGcaGgaccTcCacAatcagggcacAta
drm_qtl_snprnt169	MDC016342.173:2882	9:3371818	Chr16:38230061	T	C	CGTTtAaagtcAgaaggaAACGCGGTTTCTtGGGAAGCGTtTTAATtcttTTACCTTCATtTGGGTTCG[Y]CGGTTTTGGAACCAGAACTTGACCTGgCGCGGCTTCAGCCCCAGgTCTTGACTCAGTTTCATCCTCTGCT
drm_qtl_snprnt170	MDC016342.173:3484	9:3372420	Chr16:38230663	T	G	GGAAaGGCAGCTGATGATGcGcAGGCATGAAGTTGAAGTTAGGGTTCTGGATCGGCGACGgaAAGAGGG[K]TTCCGaGCTGACtACGTTGCCACCTCCCATGGCCATGCTTGACATTAtTTGGCAaTcCCCATACATTATT
drm_qtl_snprnt171	MDC016342.173:15469	9:3384405	Chr16:38242648	T	C	AGACATGGAGCTGGCATTGGGCCGaGGAGAAATAATaTCTGGCTTCAGGCGCAaAGACATAGtAGCTGG[Y]ATTGGaCtGGGAGATATTGTTATTGGATACCAtTAtTTAGtACACTATATACGAGATATGTTTCATGAAa
drm_qtl_snprnt172	MDC016342.173:15906	9:3384842	Chr16:38243085	T	C	CGTTCCTCATTTGCATgATCATTGTATTTTAATTCATAACTTTTATTTATATTCGTTGTTCTCATGCtT[Y]CTAATATGGCTTtgTacCagcacGtgcctacCCtGatgtTcagggaatatcaGggtctGGcgTGTCAtct
drm_qtl_snprnt173	MDC016342.173:16742	9:3385678	Chr16:38243921	A	G	CTTTTGtGTCaTCCATGAATTTTTGTAGTTCAATTGCAGcTGAGgTTCTTgCTaTAATTGAGGtTATTC[R]AGTTGCCTGGGTGtgTGAATGGCATCACAcTTGGTTGGAGACGGACTCAACTAcAGTGATTCACTACTTA
drm_qtl_snprnt174	MDC016342.173:16797	9:3385733	Chr16:38243976	A	G	AATTGAGGtTATTCAAGTTGCCTGGGTGtgTGAATGGCATCACAcTTGGTTGGAGACGGACTCAACTAc[R]GTGATTCACTACTTAAACTtTCCTAGTTCTATTATTCCTTGtTATTTGCATGTTGATTGGAGCAATTGCT
drm_qtl_snprnt176	MDC016682.57:26648	9:3852547	Chr09:4237435	T	A	ATCGTTGCACTCAACyAACGCCGAGCTTTTGAGCCGGCCAGCCAGTGGATAGAAGTGAACTAAAGCTTt[W]GATAGAGACTCTTGCAAGCGCTGAGATTTTCTGGTCTCTGAAGTTTCGGAAGCAAAACCAGAATCGCTAT
drm_qtl_snprnt177	MDC016778.148:1457	9:151148	Chr09:30332368	C	G	cacrgrcTTAtTttctAgTacattCtAAAaCatccattACTAtAaAacaaaaacgTgcatTAgTcaatc[S]tacttatwaAAAggaaAccacgagAcgCAtagAtTtggATTCACTTAACCAATTAGCAaTtAccAcTAcc
drm_qtl_snprnt178	MDC016778.148:3725	9:153416	Chr09:30334636	A	C	aAgcaCataCAttgGtTtcCAccAtatcctAAtTTGtTccAttCATgcTtGGtTttgAacgtaaaAAgt[M]ggtAcatAGatggATTATCgGCAACAAAATAATTAAgtTattAAGCaAgcAcacatAccAtaTgggccat
drm_qtl_snprnt179	MDC016778.148:4826	9:154517	Chr09:30335737	G	C	agacctgAGatgTtTcgcCattccTGcTagAgaTtGcagCTTctCAccgattcTTccaggaattgAtgG[S]TtggAcGgaccaTCTcCctcacctttTCTCCATTTTTGTAAATTTTaaacgcTggaAcggtTctTatGcT
drm_qtl_snprnt180	MDC016778.148:5772	9:155463	Chr09:30336683	T	C	GcAatAgaGaacAgagttggaActatCAtatttGAgGccctccccataagCagagcaggcttCatcAaA[Y]ctTccagagcTaAaaaGAtcttTACCCTGAGAACGAGCATttgCAAcCttcttcActttatTcgaAaCCc
drm_qtl_snprnt181	MDC016778.148:5793	9:155484	Chr09:30336704	T	A	ActatcaTaTttgAggcccTccccAtAAGcAgagcAggCttcAtCaAatcttccAGAGctAaAaAGAtc[W]ttAccctGAGAacGAGcatttGcaAccttcttcActttatTCGaaacCCTCATTACTTCAACATTactgt
drm_qtl_snprnt182	MDC017225.184:9619	9:3295442	Chr09:3537492	A	C	ttTATtTAaggTTtcTtgaagCtgTcTgcTTCgTaTaTATGTAATGTTTTGAAACTTTcTacatgaaAc[M]gaagtTAgAcagcttaGcTttacTgtcAGactaAtgtctgtcttTattttCacAAggtcGgaTAtCACAG
drm_qtl_snprnt183	MDC017689.144:9435	9:565830	Chr09:510200	T	G	GGTCGGGAGATTGGACTTCAACATCGTCTAGCTCGAACTTGAGCGTtGGAAAGTTgAGGCTCgGCGGAG[K]TAgGgTGCTcTGCTGATCCAaCTCTGAGGATGGAGGAaTtGTGaTTTTCTTAgATTCTGAtATGGACATA
drm_qtl_snprnt184	MDC019085.550:4609	9:3698817	NA	A	G	AAGTTGCAcTTGTTGTACTTGTAAAGAGTATTTTCAAGGTTGGGTAGGACTTAACCACAATTGTCACAA[R]GCATATGGCCCAACATGCAAGAGCaAACCACCCAAAATCTGGAACAAGGATGAACGTTAGTAGAATCAAG
drm_qtl_snprnt185	MDC019876.131:4413	9:1659604	Chr09:1783396	A	C	AAGGTAgGTCtTGGCCAAACgccAGGACCAATagGGCaGTCACAgtTTGAAAAAtTGCTGGCACGAaAA[M]cGCtAGCCTCCAAGCaGtGgAGGAagGCACGTcGAATGACATGATGAaAGAATAAATGAGTGGCATGACc
drm_qtl_snprnt186	MDC020324.228:7762	9:1180829	Chr03:33248394	C	T	TTCTTTtTCCGcCATTATTTTTCTAATTGTTCtTTCAATCTCCttTCTATCCAcCCCATGCTCyAACTG[Y]AACCCAACTTTCCACACATGACTCACATATCtTGCATTTGCCATTTgATCACTTAGACATGGCATGCAAA
drm_qtl_snprnt187	MDC020324.228:10402	9:1183469	Chr03:33245755	C	T	TTGGTAGGTGATGGGTGGTTGAATCArTTcAATGACTAATCTATATTTGGTAAAcAaAGTTTrCtATCG[Y]AGAATtCGGGACTGAGGAAGTGAGAGGGAAAAAGATGTGTtGAGTCTGgGAGAGGAACTGGGCATGAGAA
drm_qtl_snprnt188	MDC020324.228:10408	9:1183475	Chr03:33245749	T	C	GGTGATGGGTGGTTGAATCArTTcAATGACTAATCTATATTTGGTAAAcAaAGTTTrCtATCGCAGAAT[Y]CGGGACTGAGGAAGTGAGAGGGAAAAAGATGTGTtGAGTCTGgGAGAGGAACTGGGCATGAGAAGAGAAC
drm_qtl_snprnt189	MDC020380.185:16381	9:1118572	Chr09:1091245	C	A	CACCGCATCTATGGGAAATTTATGGTGCACCGCCCGTTCATccGgAAAGCAATCAACAACATCTTCTAT[M]ATTTTATtTTTGAAACTGAAAAGCATAATGGGATTGCaGAGCTGTTAGAGATTTTGGGAAGTATAATAAA
drm_qtl_snprnt190	MDC020380.185:16452	9:1118643	Chr09:1091316	T	C	TTTTATtTTTGAAACTGAAAAGCATAATGGGATTGCaGAGCTGTTAGAGATTTTGGGAAGTATAATAAA[Y]GGTTTTGCTCTGCCgCTGAAAGAAGAGCACAAaCTCTTTCTTGTTCGAGTGCTTATTCCACTTCACAAAC
drm_qtl_snprnt191	MDC021089.154:2043	9:3951771	Chr09:4416663	T	A	GkAGTGATAGCmgCCGCmGTGGcAGATTcTTTTTATGAATTgGTTGTGAGTTGAAAATGGtGAATGAAg[W]GGTCCTGAAGGCGGTTTTCCCTTTACTGGAGGGTGTGGACCTTGCTTcTtGTATGGGgGTGtGCAAGCGG
drm_qtl_snprnt192	MDC021089.154:2101	9:3951829	Chr09:4416605	G	A	GGTGAATGAAGtGGTcCTGAAGGCGGTTTTcCCTTTACTGGAGGGtGTGGAcCTTGCTTCTTGTATGGG[R]GTGTGCAAGCgGTGGAGACagATAgCTcGAGATGATTTCTTTTGGAAGcGTcTATGtGCCaAGAGATGGc
drm_qtl_snprnt193	MDC021089.154:2127	9:3951855	Chr09:4416579	C	G	TTTTcCCTTTACTGGAGGGtGTGGAcCTTGCTTCTTGTATGGGgGTGTGCAAGCgGTGGAGACagATAg[S]TcGAGATGATTTCTTTTGGAAGcGTcTATGtGCCaAGAGATGGCCCTCTACCTGCAAGCGACCTAACCCT
drm_qtl_snprnt194	MDC021089.154:3433	9:3953161	Chr09:4415273	C	T	TaCcGACaTTCGTAACATCGCCAGCACtGCCaACGTTGAACACTGTCGtGGTAACCCACCAGaGGTTgC[Y]gTTGAGCTCaAACTTAACCCCTCCaCTCTTCcGGttCGAGACtCTGCGGTACTTAACTGGAtTGATACCG
drm_qtl_snprnt195	MDC021089.154:3450	9:3953178	Chr09:4415256	A	C	TCGCCAGCACtGCCaACGTTGAACACTGTCGtGGTAACCCACCAGaGGTTgCCgTTGAGCTCaAACTTA[M]CCCCTCCaCTCTTCcGGttCGAGACtCTGCGGTACTTAACTGGAtTGATACCGGCTTTTGTCTGTGCGAG
drm_qtl_snprnt196	MDC021089.154:4588	9:3954316	Chr09:4414123	A	G	ckTGTTtGAACTGACAATCTTTAATTAcTaTGcaTACTATAAcTaAAAGAgATTCTTAAgTTCgcccGc[R]CAAACtAtcTttTTracgtcaaaattmAacAtaatTctcAAcgAtgccggcgGgttAgccgatttaCGaa
drm_qtl_snprnt197	MDC021373.184:3200	9:307212	Chr07:7657561	T	G	acaTGATAAATTAATCAAAyGAATTcatctTAttAAcTaaTgAtTgtCtgaatcAtwTgccatgTTatA[K]aatacatcAAGatggTaTaaaTwTgTgrTctcccAgAtTgTactcaaatttgaAAtAcaaTaAataaaat
drm_qtl_snprnt198	MDC021373.184:4244	9:308256	Chr07:7658604	T	C	gaaAGATGGGAGgTTtAGtAGgGAgGCtgTgGArGCAaTtGGgTatAGAGGgAaGCTtTGgATGGTgAA[Y]GTgAAGGGcaAtgCaagAAAAGAaGGAGCTGTtTAtGAcGTGGAaAAtGACACaTGGCAAGACATGCCtc
drm_qtl_snprnt201	MDC022036.54:17494	9:3948005	Chr09:4407141	G	T	AAGtTCCAGTGCTGCTTCTCTtGCaGAAATTGCaGAATCACAAAAtCTTCCTTCAACAGCTGATTGAAC[K]mGTTTaTCTCCTAAtACCTGtGGATCAGCTTCTACAATtATACTGACCTGTtcATCaTATTAAGAGAtTt
drm_qtl_snprnt202	MDC022206.380:22598	9:554265	Chr09:503669	A	C	cTTTCCagaTGAGCTTCCGAAGCTGGTGGGAAAGTTcTTGAATCTgGTTGAGGAtGAGGTGGTGtCGAA[M]CGCGACTCcGGCGACGCTAAGGTGAAgTGGTGTCAGGAGCCTGAGAAcGACGCaTTGTTTCTGGATtCTC
drm_qtl_snprnt205	MDC025684.14:2939	9:112416	Chr07:8554467	T	A	GGAGcaGaTGCAGATTGGAGGAAGTAGGAAGAtGGTtAGaAACAGTGGTAATGAtgtTaGtgCtGatTT[W]aTGGTGGAAGAtGTtGAcTGATGaAGTGCTTgGTgTGGAACTGCAtGGGtTGGGGTAGACCTtAaTTTGC
drm_qtl_snprnt206	MDC029331.22:543	9:723473	Chr09:700536	G	A	GAATTATTTTAGaCGTCCCCGATGACCAACTTATGCATAACTTCGAAACAtATACTAGAATACAGAGTT[R]CaACAAGTAGaAcagtgGcaAtacCgGaAAcatTTTagtTTTcgtTaAAcacCgAcCgagGGctTcagtt

## Sheet: Supp. Table 4
Basic characteristics of the parental genetic linkage groups for ‘M13/91’ and ‘Fred Hough’. cM: centiMorgan units.
Linkage group	Number of markers		Total distance (cM)		Average distance (cM)		Gaps > 10 cM
	M13/91	FH	M13/91	FH	M13/91	FH	M13/91	FH
1	28	47	72.654	69.693	2.69089	1.51507	2	0
2	75	74	85.844	70.388	1.16005	0.964219	1	0
3	63	91	90.831	70.837	1.46502	0.787078	0	0
4	34	32	58.375	43.255	1.76894	1.39532	0	0
5	67	29	92.733	98.057	1.40505	3.50204	1	3
6	43	41	78.264	65.528	1.86343	1.6382	0	0
7	21	31	85.715	46.053	4.28575	1.5351	3	0
8	51	29	72.147	61.967	1.44294	2.21311	0	2
9	74	85	69.977	68.075	0.958589	0.810417	1	0
10	54	41	101.684	49.199	1.91857	1.22998	1	1
11	54	16	86.23	27.524	1.62698	1.83493	0	1
12	63	64	69.671	57.264	1.12373	0.908952	0	0
13	41	19	84.663	46.426	2.11658	2.57922	2	0
14	31	46	67.887	62.298	2.2629	1.3844	2	0
15	33	47	83.486	60.523	2.60894	1.31572	3	1
16	42	67	61.191	58.92	1.49246	0.892727	1	0
17	10	32	32.417	57.979	3.60189	1.87029	1	1
Total	784	791	1293.77	1013.99
Average	46.1176	46.5294	76.1041	59.6462	1.98781	1.55157

## Sheet: Supp. Table 5
Supplementary Table 5. Quantitative trait loci detected for bud break date on linkage group 9 (LG9) using restrict multiple QTL mapping in the ‘M13/91’ x ‘Fred Hough’ segregating population in different years in Bento Gonçalves and Vacaria. Maximum LOD scores are presented with considered linkage group (LG) and genome-wide (GW) LOD thresholds shown below year indication along with percentage of t…
		Fred Hough - Bento Gonçalves																Fred Hough - Vacaria
Position cM	Position bp (GDDH13.1.1)	Year>>	2011		2012		2013		2014		2015		2016		2017		Average		2011		2012		2014		2015		2017		Average
		LOD threshold (LG/GW)>>	6,6/8,2		8,0/8,3		6,3/7,6		7,0/7,7		6,3/7,2		7,5/8,9		5,2/7,2		5,6/6,4		5,2/6,4		5,6/7,2		5,3/6,8		5,5/6,6		5,4/9,6		4,7/7,1
		LG9 markers	LOD	% exp.	LOD	% exp.	LOD	% exp.	LOD	% exp.	LOD	% exp.	LOD	% exp.	LOD	% exp.	LOD	% exp.	LOD	% expl	LOD	% expl	LOD	% expl	LOD	% expl	LOD	% expl	LOD	% expl
0	3736754	drm_qtl_snprnt147	14.39	35.5	9.22	24.4	11.22	29	14.43	35.6	14.29	35.3	14.23	35.2	13.83	34.4	22	48.6	7.54	27.7	9.98	34.7	10.1	37.8	9.51	34.1	15.03	48.6	14.86	46
0.341	3094340	drm_qtl_snprnt113	15.08	36.9	9.3	24.5	11.71	30	14.93	36.6	15.51	37.7	14.33	35.4	13.83	34.4	22.83	49.9	8.61	31	10.87	37.1	10.69	39.5	10.86	37.9	16.74	52.4	16.49	49.5
1.409	3312441	drm_qtl_snprnt129	13.03	32.8	9.15	24.2	10.96	28.4	13.38	33.5	14.73	36.2	13.46	33.7	13.21	33.2	21.25	47.5	7.89	28.8	10.31	35.6	9.96	37.4	9.46	34	14.96	48.4	14.89	46.1
1.717	3294462	drm_qtl_snprnt134	12.4	31.5	8.93	23.7	10.69	27.8	12.88	32.5	14.48	35.7	13.15	33	12.95	32.6	20.65	46.5	7.77	28.4	10.1	35	9.82	37	9.04	32.7	14.43	47.2	14.45	45.1
1.857	3280744	drm_qtl_snprnt137	10.63	27.7	5.76	16	8.29	22.3	10.28	26.9	9.2	24.5	8.28	22.3	9.63	25.5	14.13	34.8	8.03	29.2	10.24	35.4	9.75	36.7	9.65	34.5	14.97	48.5	14.84	46
2.167	3307148	drm_qtl_snprnt132	10.66	27.8	5.64	15.7	8.07	21.8	10.13	26.6	9.02	24	8.26	22.3	9.6	25.4	13.93	34.4	7.72	28.3	10.08	34.9	9.65	36.5	9.26	33.4	14.37	47.1	14.43	45.1
2.206	3312215	drm_qtl_snprnt131	10.94	28.4	5.64	15.7	8.05	21.8	10.36	27.1	9.11	24.3	8.26	22.3	9.56	25.3	14.07	34.7	7.84	28.6	10.43	35.9	9.77	36.8	9.21	33.2	14.79	48.1	14.64	45.5
2.74	3726276	drm_qtl_snprnt100	11.02	28.5	5.86	16.3	7.91	21.4	10.53	27.5	9.01	24	8.32	22.4	9.58	25.3	14.1	34.8	7.07	26.2	10.1	35	9.2	35.1	8.09	29.9	13.49	45	13.4	42.7
2.744	3716655	drm_qtl_snprnt56	11.03	28.6	5.86	16.3	7.9	21.4	10.51	27.4	9.03	24.1	8.33	22.4	9.55	25.3	14.11	34.8	7.02	26.1	10.06	34.9	9.17	35	8.07	29.8	13.44	44.9	13.35	42.5
2.781	3736893	drm_qtl_snprnt146	11.03	28.6	5.86	16.3	7.9	21.4	10.51	27.4	9.03	24.1	8.33	22.4	9.55	25.3	14.11	34.8	7.02	26.1	10.06	34.9	9.17	35	8.07	29.8	13.44	44.8	13.35	42.5
2.908	3726218	drm_qtl_snprnt101	10.37	27.1	5.08	14.3	6.9	19	9.12	24.3	8.27	22.3	7.72	21	8.45	22.7	12.62	31.8	5.45	20.9	8.68	30.9	7.9	31	7.22	27.1	11.24	39.2	11.47	37.9
2.918	3732422	drm_qtl_snprnt51	10.37	27.1	5.08	14.3	6.9	19	9.12	24.3	8.27	22.3	7.72	21	8.45	22.7	12.62	31.8	5.45	20.9	8.68	30.9	7.9	31	7.22	27.1	11.24	39.2	11.47	37.9
2.935	3737725	drm_qtl_snprnt145	10.74	27.9	5.29	14.8	7.19	19.7	9.62	25.4	8.66	23.2	7.78	21.1	8.61	23.1	13.15	32.9	6.02	22.8	9.12	32.2	8.29	32.3	7.6	28.3	12.12	41.5	12.14	39.6
3.005	3297566	drm_qtl_snprnt133	10.76	28	5.43	15.2	7.31	20	9.59	25.4	8.85	23.6	8.16	22	8.64	23.2	13.29	33.1	5.96	22.6	9	31.9	8.25	32.1	7.63	28.4	12.03	41.3	12.07	39.4
3.107	3136028	drm_qtl_snprnt109	10.74	27.9	5.58	15.6	7.45	20.3	9.54	25.2	9.01	24	8.54	22.9	8.67	23.2	13.43	33.4	5.85	22.3	8.72	31	8.1	31.6	7.57	28.2	11.82	40.7	11.86	38.9
3.133	3312278	drm_qtl_snprnt130	10.72	27.9	5.61	15.6	7.47	20.4	9.52	25.2	9	24	8.62	23.1	8.67	23.2	13.45	33.5	5.81	22.1	8.64	30.8	8.04	31.5	7.53	28.1	11.75	40.6	11.79	38.7
3.442	4424801	drm_qtl_snprnt64	10.06	26.4	5.73	15.9	7.53	20.5	9	24	8.55	22.9	9.31	24.7	8.4	22.6	13.26	33.1	5.26	20.3	7.61	27.7	7.12	28.4	6.69	25.4	10.8	38	10.61	35.6
3.495	4229712	drm_qtl_snprnt125	9.04	24.1	5.79	16.1	7.28	19.9	8.48	22.8	8.74	23.4	9.47	25.1	8	21.7	12.91	32.4	4.72	18.4	6.7	24.9	6.53	26.4	6	23.1	9.22	33.5	9.42	32.4
3.643	4407141	drm_qtl_snprnt201	8.61	23.1	4.56	12.9	6.76	18.6	7.56	20.6	6.05	16.8	7.67	20.9	7.53	20.5	10.47	27.2	4.35	17.1	5.99	22.5	5.84	24	5.55	21.6	8.26	30.6	8.55	29.9
3.703	4197802	drm_qtl_snprnt25	9.41	24.9	4.69	13.2	7.31	20	8.22	22.2	6.8	18.7	8.73	23.4	8.03	21.7	11.58	29.6	4.39	17.2	6.05	22.7	5.85	24	5.56	21.6	8.27	30.7	8.62	30.1
3.794	4195952	drm_qtl_snprnt13	9.4	24.9	4.69	13.2	7.31	20	8.21	22.2	6.8	18.7	8.72	23.4	8.03	21.7	11.57	29.6	4.38	17.2	6.05	22.7	5.85	24	5.55	21.6	8.27	30.7	8.61	30.1
3.798	4209860	drm_qtl_snprnt37	10.32	27	4.83	13.6	7.49	20.4	8.87	23.7	6.83	18.8	8.44	22.7	8.73	23.4	12.06	30.6	6.16	23.3	8.05	29	7.69	30.3	7.21	27.1	12.01	41.2	11.61	38.2
3.798	4208105	drm_qtl_snprnt36	10.22	26.8	4.88	13.8	7.6	20.7	8.77	23.5	6.86	18.9	8.48	22.8	8.72	23.3	12.08	30.7	6.12	23.1	7.77	28.2	7.57	29.9	7.22	27.2	11.7	40.4	11.44	37.8
3.84	4234586	drm_qtl_snprnt126	10.44	27.3	5.66	15.8	8.03	21.7	9.17	24.4	8.11	21.9	9.69	25.6	9.05	24.1	13.4	33.4	6.12	23.1	7.75	28.1	7.57	29.9	7.28	27.3	11.86	40.9	11.49	37.9
3.863	4202428	drm_qtl_snprnt30	10.22	26.8	4.67	13.2	7.59	20.7	8.85	23.6	6.98	19.2	8.45	22.7	8.82	23.6	12.11	30.7	6.23	23.5	8.12	29.3	7.8	30.7	7.13	26.9	11.42	39.7	11.51	38
3.877	3181735	drm_qtl_snprnt140	11.17	28.9	5.44	15.2	8.33	22.4	9.61	25.4	8.05	21.8	8.89	23.7	9.41	25	13.52	33.6	6.99	26	8.98	31.8	8.48	32.9	8.41	30.9	12.95	43.6	12.99	41.7
4.421	4197699	drm_qtl_snprnt23	10.26	26.9	4.69	13.2	7.51	20.5	9.05	24.1	6.83	18.8	7.63	20.8	8.59	23	11.92	30.3	6.61	24.8	8.46	30.3	7.43	29.5	7.06	26.6	11.26	39.3	11.46	37.9
4.547	4237435	drm_qtl_snprnt176	10.3	27	4.88	13.8	7.63	20.8	9	24	7.1	19.5	7.71	20.9	8.65	23.2	12.14	30.8	6.7	25	8.54	30.5	7.57	29.9	7.16	26.9	11.24	39.2	11.56	38.1
4.762	3537492	drm_qtl_snprnt182	10.56	27.5	5.67	15.8	8.38	22.5	9.38	24.9	7.55	20.6	8.86	23.7	9.47	25.1	13.18	32.9	6.42	24.1	8.1	29.2	7.7	30.3	7.15	26.9	10.81	38	11.33	37.5
5.627	4198563	drm_qtl_snprnt29	11.56	29.7	5.43	15.2	8.55	23	10.85	28.2	7	19.2	11.14	28.8	10.6	27.6	14.04	34.7	5.09	19.7	7.39	27	7.21	28.7	6.22	23.9	9.69	34.9	10.05	34.1
6.306	4198414	drm_qtl_snprnt26	12.94	32.6	5.12	14.4	8.58	23	11.35	29.3	6.72	18.5	12.06	30.8	10.76	28	14.32	35.2	5.4	20.7	8.2	29.5	8.01	31.4	6.93	26.2	10.29	36.6	10.99	36.6
6.314	4197242	drm_qtl_snprnt18	12.86	32.4	5.16	14.5	8.65	23.2	11.27	29.1	6.73	18.6	12.1	30.9	10.75	28	14.32	35.2	5.36	20.6	8.02	29	7.92	31.1	6.94	26.2	10.1	36.1	10.88	36.3
6.315	4196989	drm_qtl_snprnt15	12.97	32.7	5.24	14.7	8.78	23.5	11.4	29.4	6.81	18.8	12.15	31	10.8	28.1	14.49	35.5	5.49	21	8.19	29.5	8.04	31.5	7.04	26.6	10.31	36.7	11.08	36.8
6.528	4197363	drm_qtl_snprnt21	11.14	28.8	5.29	14.8	9.45	25	11.25	29	6.64	18.3	11.38	29.3	10.47	27.3	13.94	34.4	5.87	22.3	9	31.9	8.67	33.5	7.73	28.7	11.04	38.7	11.92	39
7.328	3311991	GDsnp00679_Lg9	11.03	28.6	5.62	15.7	9.42	25	11.46	29.5	7.29	19.9	10.96	28.4	10.37	27.1	14.33	35.2	5.83	22.2	8.87	31.5	8.77	33.8	7.99	29.6	10.97	38.5	11.98	39.2
9.034	4228824	AG_3818449_Lg9	11.02	28.5	6.36	17.5	9.99	26.3	12.19	31.1	7.98	21.6	10.79	28	10.44	27.3	15.24	37	6.43	24.2	9.6	33.6	9.71	36.6	8.39	30.8	12.24	41.9	12.86	41.3
9.22	4237127	TC_3824404_Lg9	10.97	28.4	6.43	17.7	10	26.3	12.22	31.1	8.04	21.7	10.72	27.9	10.42	27.2	15.28	37.1	6.44	24.2	9.61	33.6	9.76	36.8	8.42	30.9	12.31	42	12.88	41.4
15.574	5425945	GA_4699317_Lg9	6.86	18.9	7.23	19.7	7.61	20.7	9.1	24.2	7.41	20.2	6.38	17.7	6.79	18.7	11.74	29.9	3.91	15.5	7.78	28.2	8.68	33.5	7.3	27.4	10.72	37.8	10.03	34
15.873	6097384	TC_5399131_Lg9	6.82	18.8	7.2	19.6	7.5	20.4	8.95	23.9	7.34	20.1	6.61	18.2	6.69	18.4	11.63	29.7	3.8	15.1	7.61	27.7	8.51	33	7.15	26.9	10.5	37.2	9.8	33.4
16.765	6084623	CT_5387010_Lg9	5.81	16.2	6.53	18	6.89	18.9	8.14	22	7.16	19.6	6.07	16.9	6.14	17.1	10.55	27.3	3.41	13.6	7.8	28.3	7.86	30.9	7.07	26.7	9.28	33.7	8.94	31
17.231	5500764	TC_4757607_Lg9	5.19	14.6	5.92	16.4	6.08	16.9	7.49	20.4	6.83	18.8	5.32	15	5.71	16	9.59	25.2	3.08	12.4	7.76	28.2	7.24	28.9	6.91	26.1	8.42	31.1	8.28	29.1
17.312	6780589	CT_5966501_Lg9	5.81	16.2	6.65	18.2	6.39	17.7	7.93	21.5	7.05	19.3	5.72	16	5.67	15.9	10.25	26.7	3.5	14	8.61	30.7	7.92	31.1	6.91	26.1	9.27	33.7	8.92	30.9
17.687	6847858	AG_6024891_Lg9	5.81	16.2	6.65	18.2	6.39	17.7	7.93	21.5	7.05	19.3	5.72	16	5.67	15.9	10.25	26.7	3.5	14	8.61	30.7	7.92	31.1	6.91	26.1	9.27	33.7	8.92	30.9
19.108	7566047	TG_6761696_Lg9	5.84	16.3	5.95	16.5	5.51	15.5	6.74	18.6	6.15	17.1	4.85	13.8	4.24	12.1	8.84	23.5	3.22	12.9	6.92	25.5	6.32	25.7	4.12	16.5	7.21	27.3	6.68	24.2
19.267	7587391	AG_6782368_Lg9	5.01	14.2	5.11	14.3	5.08	14.3	6.22	17.3	6.04	16.8	4.33	12.4	4.29	12.3	8.1	21.8	2.68	10.9	6.19	23.2	5.6	23.1	4.18	16.7	6.23	24.1	5.97	21.9
21.29	8536504	GDsnp00893_Lg9	5.28	14.9	4.25	12.1	4.99	14.1	5.98	16.7	5.55	15.6	4.11	11.8	3.92	11.3	7.67	20.7	3.01	12.2	6.65	24.7	5.75	23.7	4.22	16.9	6.57	25.3	6.24	22.8
21.87	8043142	CA_7220033_Lg9	5.39	15.1	5.82	16.2	5.7	15.9	6.65	18.4	6.79	18.7	4.89	13.9	5.14	14.5	9.16	24.2	2.67	10.8	6.8	25.2	5.82	23.9	3.92	15.8	6.68	25.6	6.2	22.7
26.423	11415211	GDsnp01755_Lg9	3.85	11.1	3.38	7.4	4.53	12.9	5.09	14.4	4.45	12.7	3.37	9.8	4.21	12.1	6.26	17.3	1.31	5.5	5.43	20.7	4.69	19.8	3.19	13.1	5.32	21	4.2	16
27.786	11981411	GDsnp00947_Lg9	3.27	9.5	2.47	6.3	4.06	11.6	4.28	12.2	3.55	10.3	2.82	8.2	3.5	10.1	5.03	14.1	1.13	4.7	4.98	19.1	4.4	18.7	2.67	11.1	4.68	18.7	3.52	13.6
29.458	12564619	GDsnp00331_Lg9	2.7	4.6	1.67	3.8	3.56	10.3	3.35	9.7	2.58	7.6	2.76	8.1	2.74	8	3.88	11.1	1.13	4.8	4.34	16.9	4.02	17.2	2.19	9.1	3.98	16.1	2.88	11.3
33.345	13320209	CA_14233188_Lg9	4.16	11.9	1.97	4.4	3.35	9.7	3.88	11.2	3.61	10.4	3.63	10.5	3	8.7	4.82	13.6	1.42	5.9	4.84	18.6	3.93	16.9	2.37	9.9	4.08	16.5	3.55	13.7
33.545	13328116	GDsnp00958_Lg9	3.89	11.2	1.9	4.2	3.2	9.3	3.28	9.5	3.32	9.6	3.38	9.8	2.77	8.1	4.43	12.6	1.32	5.5	4.4	17.1	3.52	15.3	2	8.4	3.67	15	3.22	12.5
33.971	13433605	GA_14345081_Lg9	3.31	9.5	1.56	3.5	2.95	8.6	3.14	9.1	3.37	9.8	2.89	8.4	2.72	8	3.99	11.4	0.82	3.5	3.91	15.4	3.34	14.5	1.94	8.2	3.57	14.6	2.51	9.9
35.606	13780988	GDsnp02046_Lg9	2.89	5	1.14	3.7	3	8.7	2.45	7.2	2.84	8.3	2.29	6.7	2.26	6.7	3.23	9.3	0.55	2.3	3.11	12.4	2.81	12.4	1.57	6.6	2.99	12.4	1.97	7.8
38.405	14568980	GA_18289707_Lg9	2.23	3.7	0.43	1	1.5	4.5	1.16	3.5	2.38	7	2.17	6.4	2.38	7	2.16	6.3	0.59	2.5	2.15	8.8	1.57	7.1	0.75	3.2	1.43	6.1	1.52	6.1
38.683	14554282	GDsnp00109_Lg9	1.9	3.3	0.25	0.6	1.74	5.2	0.96	2.9	1.66	4.9	2	5.9	1.96	5.8	1.71	5.1	0.84	3.6	2.64	10.6	1.69	7.6	0.67	2.9	1.61	6.9	1.49	6
44.707	18319553	GA_19977586_Lg9	1.14	2.1	0.05	0.1	1.08	3.3	0.61	1.8	0.87	2.6	1.48	4.4	1.26	3.8	0.78	2.3	0.31	1.3	1.8	7.4	1.06	4.8	0.38	1.7	0.84	3.7	0.85	3.5
46.709	18999662	AC_20564976_Lg9	1.03	1.9	0.02	0.1	0.76	2.3	0.61	1.8	0.62	1.9	0.87	2.6	1.02	3.1	0.42	1.3	0.47	2	1.36	5.6	0.86	4	0.18	0.8	0.62	2.7	0.6	2.5
47.604	19019651	GA_20592637_Lg9	1.08	2	0.03	0.1	0.71	2.1	0.64	1.9	0.34	1	0.69	2.1	0.95	2.8	0.31	0.9	0.66	2.8	1.13	4.7	0.7	3.2	0.11	0.5	0.43	1.9	0.52	2.1
49.434	20223842	CT_21618606_Lg9	1.17	2.2	0.03	0	0.89	2.7	0.58	1.8	0.19	0.6	0.74	2.2	0.81	2.4	0.29	0.9	0.71	3	1.17	4.9	0.88	4.1	0.38	1.7	0.49	2.1	0.62	2.5
49.752	20200324	GT_21597933_Lg9	1.13	2.1	0.06	0.1	0.92	2.8	0.56	1.7	0.13	0.4	0.69	2.1	0.79	2.4	0.3	0.9	0.77	3.2	1.12	4.7	0.83	3.8	0.4	1.7	0.44	1.9	0.61	2.5
50.592	19576305	GT_22371843_Lg9	1.29	2.5	0.02	0	0.9	2.7	0.58	1.7	0.2	0.6	1.18	3.5	1.02	3.1	0.35	1.1	0.72	3.1	0.89	3.7	0.78	3.6	0.23	1	0.43	1.9	0.45	1.9
51.046	19824467	GT_21216802_Lg9	1.19	3.8	0.03	0	1.03	3.1	0.6	1.8	0.35	1.1	0.97	2.9	1.06	3.2	0.4	1.2	0.7	3	0.96	4	0.84	3.9	0.23	1	0.45	2	0.49	2
51.254	29429592	TC_29799492_Lg9	1.27	2.4	0.05	0.1	0.78	2.3	0.3	0.9	0.31	1	1.1	3.3	0.93	2.8	0.33	1	0.6	2.5	0.69	2.9	0.8	3.7	0.16	0.7	0.42	1.8	0.34	1.4
51.624	20185798	AG_21581072_Lg9	1.17	2.2	0.01	0	0.66	2	0.32	1	0.28	0.8	0.95	2.9	0.56	1.7	0.19	0.6	0.74	3.2	0.95	4	0.73	3.4	0.2	0.9	0.35	1.5	0.51	2.1
52.385	25961454	GDsnp00053_Lg9	1.36	2.6	0.14	0.4	0.93	2.8	0.21	0.6	0.36	1.1	1.07	3.2	0.52	1.6	0.38	1.1	0.39	1.7	0.7	2.9	0.73	3.4	0.19	0.8	0.36	1.6	0.29	1.2
52.678	25981758	GA_24193344_Lg9	1.15	2.2	0.09	0.2	0.81	2.5	0.14	0.4	0.41	1.2	1.53	4.6	0.46	1.4	0.29	0.9	0.61	2.6	0.68	2.9	0.7	3.2	0.14	0.6	0.3	1.3	0.37	1.5
52.681	26015105	AG_24160721_Lg9	1.15	3.6	0.09	0.2	0.82	2.5	0.14	0.4	0.41	1.2	1.54	4.6	0.46	1.4	0.29	0.9	0.61	2.6	0.68	2.9	0.7	3.2	0.14	0.6	0.3	1.3	0.37	1.5
52.701	25986653	GT_24188449_Lg9	0.99	1.8	0.08	0.2	0.81	2.4	0.14	0.4	0.41	1.2	1.42	4.2	0.27	0.8	0.23	0.7	0.62	2.6	0.65	2.8	0.64	3	0.11	0.5	0.25	1.1	0.34	1.4
53.356	29406172	TC_29773504_Lg9	1.03	1.9	0.15	0.4	0.6	1.8	0.24	0.7	0.11	0.3	1.17	3.5	0.24	0.7	0.22	0.7	0.64	2.7	0.54	2.3	0.48	2.2	0.17	0.8	0.19	0.8	0.25	1
53.886	30522473	GDsnp00860_Lg9	0.71	1.1	0.08	0.2	0.28	0.8	0.18	0.6	0.31	1	1.17	3.5	0.13	0.4	0.06	0.2	0.64	2.7	0.44	1.9	0.41	1.9	0.23	1	0.02	0.1	0.31	1.3
54.768	29915167	CT_30227604_Lg9	0.84	1.4	0.16	0.4	0.34	1	0.14	0.4	0.25	0.8	1.37	4.1	0.14	0.4	0.11	0.3	0.75	3.2	0.52	2.2	0.42	2	0.57	2.5	0.04	0.2	0.47	1.9
56.879	30473055	TG_35859865_Lg9	0.75	1.2	0.21	0.5	0.11	0.3	0.23	0.7	0.15	0.5	0.93	2.8	0.18	0.6	0.09	0.3	0.47	2	0.43	1.8	0.38	1.8	0.41	1.8	0.01	0	0.35	1.5
62.047	33742549	CT_32698252_Lg9	1.4	2.6	0.23	0.6	0.3	0.9	0.06	0.2	0.02	0.1	1.09	3.3	0.28	0.8	0.28	0.8	1.13	4.7	0.98	4.1	0.64	3	0.8	3.4	0.21	0.9	0.91	3.7
62.24	32680402	CT_31701102_Lg9	1.22	2.3	0.17	0.4	0.22	0.7	0.04	0.1	0.15	0.4	1.28	3.8	0.28	0.9	0.17	0.5	0.87	3.7	0.87	3.7	0.8	3.7	0.82	3.5	0.27	1.2	0.91	3.7
62.783	33037311	CT_31984731_Lg9	1.03	1.8	0.13	0.3	0.2	0.6	0.04	0.1	0.19	0.6	1.26	3.8	0.31	0.9	0.14	0.4	0.76	3.2	0.86	3.6	0.75	3.5	0.77	3.3	0.26	1.2	0.88	3.6
62.791	33372705	GA_32297817_Lg9	0.96	1.6	0.2	0.5	0.26	0.8	0.19	0.6	0.32	1	1.22	3.6	0.4	1.2	0.19	0.6	0.59	2.5	0.91	3.8	0.83	3.8	0.52	2.3	0.28	1.3	0.78	3.2
62.806	33001354	TC_31964859_Lg9	0.96	1.6	0.2	0.5	0.26	0.8	0.19	0.6	0.32	1	1.22	3.6	0.4	1.2	0.19	0.6	0.59	2.5	0.91	3.8	0.83	3.8	0.52	2.3	0.28	1.3	0.78	3.2
63.472	33587227	TC_32540237_Lg9	1.49	2.8	2.91	7.1	1.58	4.7	0.61	1.9	2.14	6.3	3.02	8.8	1.55	4.6	2.04	6	0	0	0	0	0	0	0	0	0	0	0	0
65.195	33754289	GA_32711352_Lg9	1.92	3.3	2.88	7.1	1.6	4.8	0.49	1.5	2.48	7.3	2.28	6.7	1.6	4.8	2.29	6.7	1.21	5.1	1.38	5.7	1.07	4.9	0.49	2.1	0.57	2.5	1.03	4.2
66.815	34289996	CT_33180045_Lg9	1.93	5.6	0.3	0.7	0.84	2.5	0.22	0.7	0.05	0.1	2.34	6.9	0.72	2.2	0.67	2	1.36	5.7	1.76	7.2	0.84	3.9	0.52	2.2	0.46	2	1.01	4.1
66.823	34343047	GA_33227831_Lg9	1.79	3.2	0.79	1.9	0.69	2.1	0.06	0.2	0.65	2	2.59	7.6	0.31	1	0.83	2.5	1.36	5.7	1.76	7.2	0.84	3.9	0.52	2.2	0.46	2	1.01	4.1
66.825	34267328	AG_33204080_Lg9	1.75	3.1	1.26	3.1	0.8	2.4	0.01	0	1.01	3	3.36	9.7	0.45	1.4	0.99	3	1.35	5.6	1.84	7.6	1.05	4.8	0.51	2.2	0.57	2.5	1.06	4.3
67.894	34161160	GA_33077622_Lg9	1.53	2.9	2.52	6.4	1.61	4.8	0.15	0.5	1.51	4.5	3.93	11.3	0.71	2.1	1.62	4.8	1.2	5.1	1.53	6.3	0.64	3	0.37	1.6	0.34	1.5	0.84	3.4
68.075	34549325	TC_33439813_Lg9	1.53	2.9	2.52	6.4	1.61	4.8	0.15	0.5	1.51	4.5	3.92	11.3	0.71	2.1	1.62	4.8	1.21	5.1	1.53	6.3	0.64	3	0.37	1.6	0.34	1.5	0.84	3.4
			M13/91 - Bento Gonçalves																M13/91 - Vacaria
		Year>>	2011		2012		2013		2014		2015		2016		2017		Average		2011		2012		2014		2015		2017		Average
		LOD threshold (LG/GW)>>	6,0/9,3		6,6/8,9		5,5/7,6		6,7/7,2		9,0/9,4		7,1/8,8		4,7/6,1		4,6/6,2		6,7/6,7		6,0/6,7		5,1/6,9		4,3/7,3		5,8/6,3		5,0/7,2
Position cM	Position bp (GDDH13.1.1)	LG9 markers	LOD	% exp.	LOD	% exp.	LOD	% exp.	LOD	% exp.	LOD	% exp.	LOD	% exp.	LOD	% exp.	LOD	% exp.	LOD	% expl	LOD	% expl	LOD	% expl	LOD	% expl	LOD	% expl	LOD	% expl
0	425223	TC_465054_Lg9	18.49	43.1	9.58	25.2	16.24	39.1	19.95	45.6	12.3	31.3	11.88	30.4	25.15	53.3	15.82	38.3	0*	0*	0*	0*	0*	0*	0*	0*	0*	0*	0*	0*
0.068	402487	TC_447971_Lg9	15.94	38.5	8.07	21.7	15.28	37.2	17.54	41.4	10.58	27.6	10.59	27.6	21.44	47.8	13.67	34.1	10.08	35.2	10.08	34.9	14.9	50.3	14.24	46.5	22.39	62.9	20.96	58.1
0.207	466032	CA_506758_Lg9	15.66	38	8.82	23.5	14.81	36.3	17.16	40.7	10.32	27	10.8	28.1	20.69	46.6	12.81	32.3	10.81	37.2	10.16	35.2	15.97	52.8	14.9	48	22.43	63	21.85	59.6
3.912	2472555	TC_2334882_Lg9	12.92	32.6	5.29	14.8	9.67	25.5	12.9	32.5	8.53	22.9	10.07	26.4	15.4	37.3	10.29	26.9	9.16	32.6	8.94	31.7	11.3	41.2	11.46	39.5	16.46	51.7	16.59	49.7
5.19	1266307	AG_1276715_Lg9	11.93	30.5	5.53	15.4	10.53	27.5	11.83	30.3	7.36	20.1	10.01	26.3	15.23	37	12.1	30.9	7.88	28.8	8.74	31.1	10.06	37.7	9.93	35.3	17	52.9	15.49	47.4
5.501	1671197	CA_1493110_Lg9	12.56	31.8	7.62	20.6	12.01	30.7	13.08	32.9	10.34	27	12.39	31.5	18.9	43.6	13.35	33.4	8.06	29.3	9.01	31.9	10.45	38.8	10.4	36.6	17.91	54.8	16.12	48.8
6.979	1505068	CT_1459011_Lg9	11.42	29.4	6.59	18.1	10.79	28.1	10.94	28.4	7.67	20.8	8.37	22.5	15	36.5	11.03	28.6	6.93	25.8	7.3	26.8	8.82	33.9	9.66	34.5	14.38	47.1	13.62	43.2
7.442	1888192	GDsnp00169_Lg9	11.39	29.4	6.5	17.9	10.48	27.4	11.24	29	7.66	20.8	8.39	22.6	14.71	36	9.92	26.1	6.79	25.3	7.2	26.4	8.71	33.6	9.63	34.5	14.13	46.5	13.42	42.7
7.911	2139711	GDsnp01573_Lg9	11.4	29.4	6.05	16.7	9.6	25.4	11.23	29	7.35	20.1	7.99	21.6	14.05	34.7	9.33	24.8	6.37	24	7.27	26.6	8.18	31.9	9.07	32.8	13.82	45.8	12.79	41.2
9.377	4202428	GA_3788429_Lg9	10.19	26.7	5.41	15.1	8.02	21.7	9.84	25.9	6.99	19.2	7.38	20.2	12.46	31.4	8.27	22.3	5.1	19.7	7.64	27.8	7.37	29.3	6.95	26.3	10.99	38.5	10.78	36.1
9.612	3094340	drm_qtl_snprnt113	14.57	35.9	8.62	23	11.81	30.2	14.75	36.2	13.81	34.4	13.32	33.4	21.19	47.4	12.51	31.7	7.59	27.9	10.57	36.3	10.92	40.1	10.42	36.7	15.24	49.1	15.69	47.8
10.878	3095510	drm_qtl_snprnt115	11.08	28.7	7	19.1	10.61	27.6	11.62	29.8	9.32	24.7	10.36	27.1	16.09	38.6	10.73	27.9	7.64	28	9.96	34.6	9.91	37.2	9.11	32.9	13.61	45.3	14.21	44.5
10.964	3094280	drm_qtl_snprnt112	11.07	28.7	7.03	19.2	10.53	27.5	11.44	29.5	9.49	25.1	10.35	27.1	16.04	38.5	10.42	27.2	7.17	26.6	9.66	33.8	9.63	36.4	8.97	32.5	13.17	44.2	13.76	43.5
10.964	3280744	drm_qtl_snprnt137	11.07	28.6	7.03	19.2	10.52	27.4	11.44	29.4	9.49	25.1	10.35	27.1	16.03	38.5	10.41	27.2	7.17	26.6	9.66	33.8	9.63	36.4	8.97	32.5	13.17	44.2	13.76	43.5
11.313	3294462	drm_qtl_snprnt134	5.43	15.3	5.76	16	5.27	14.9	5.23	14.7	8.06	21.8	4.61	13.1	9.26	24.5	6.46	17.9	2.74	11.1	3.2	12.8	2.61	11.5	4.77	18.9	3.89	15.8	4.96	18.6
11.456	3181735	drm_qtl_snprnt140	4.8	13.6	3.09	8.9	3.41	9.9	4.36	12.5	5.57	15.6	3.04	8.9	6.56	18	5.17	14.6	0	0	0	0	2.55	11.3	0	0	0	0	0	0
12.192	4424801	drm_qtl_snprnt64	4.18	12	3.21	9.3	3.24	9.4	4.09	11.7	5.86	16.4	3.75	10.8	6.59	18.1	4.87	13.8	1.39	5.8	0	0	0	0	3.44	14	0	0	0	0
12.236	4234586	drm_qtl_snprnt126	4.18	12	3.21	9.3	3.24	9.4	4.09	11.7	5.86	16.4	3.75	10.8	6.59	18.1	4.87	13.8	0	0	0	0	0	0	0	0	0	0	0	0
12.249	4229712	drm_qtl_snprnt125	4.18	12	3.21	9.3	3.24	9.4	4.09	11.7	5.86	16.4	3.75	10.8	6.59	18.1	4.87	13.8	0	0	0	0	2	9	0	0	0	0	0	0
12.723	4195952	drm_qtl_snprnt13	3.99	11.4	2.36	6.9	2.81	8.2	3.71	10.7	4.58	13	2.62	7.7	5.38	15	4.53	12.9	0	0	0	0	2	9	3.36	13.7	0	0	0	0
12.727	4202428	drm_qtl_snprnt30	3.99	11.4	2.36	6.9	2.81	8.2	3.71	10.7	4.58	13	2.62	7.7	5.38	15	4.53	12.9	0	0	0	0	0	0	0	0	0	0	0	0
12.728	4208105	drm_qtl_snprnt36	3.99	11.4	2.36	6.9	2.81	8.2	3.71	10.7	4.58	13	2.62	7.7	5.38	15	4.53	12.9	0	0	2.1	8.6	2	9	3.36	13.7	0	0	0	0
12.728	4209860	drm_qtl_snprnt37	3.99	11.4	2.36	6.9	2.81	8.2	3.71	10.7	4.58	13	2.62	7.7	5.38	15	4.53	12.9	0	0	0	0	2	9	0	0	0	0	0	0
12.753	4202445	drm_qtl_snprnt31	3.99	11.4	2.36	6.9	2.81	8.2	3.71	10.7	4.58	13	2.62	7.7	5.38	15	4.53	12.9	0	0	0	0	0	0	0	0	2.58	10.8	0	0
12.758	4197802	drm_qtl_snprnt25	3.99	11.4	2.36	6.9	2.81	8.2	3.71	10.7	4.58	13	2.62	7.7	5.38	15	4.53	12.9	0	0	0	0	0	0	3.36	13.7	0	0	0	0
12.768	4407141	drm_qtl_snprnt201	3.2	9.3	2.17	6.4	2.19	6.5	3.02	8.8	3.74	10.8	1.54	4.6	4.27	12.1	3.95	11.4	0	0	1.97	8.1	0	0	3.36	13.7	0	0	0	0
12.847	3710189	drm_qtl_snprnt58	5.07	14.3	3.64	10.5	3.56	10.3	4.56	13	6.72	18.5	4.11	11.8	7.57	20.5	5.43	15.3	0	0	0	0	0	0	0	0	0	0	0	0
12.924	3726218	drm_qtl_snprnt101	4.71	13.4	2.84	8.2	3.01	8.8	4.04	11.6	5.22	14.7	2.89	8.4	6.14	17	4.87	13.8	0	0	0	0	0	0	0	0	0	0	0	0
12.955	3732422	drm_qtl_snprnt51	4.64	13.2	2.78	8.1	3	8.7	3.93	11.3	5.02	14.2	2.79	8.2	5.98	16.6	4.82	13.7	0	0	0	0	0	0	0	0	0	0	0	0
13.058	3736893	drm_qtl_snprnt146	3.91	11.2	2.45	7.2	2.42	7.1	3.31	9.6	4.25	12.2	1.76	5.2	4.86	13.7	4.18	12	1.49	6.2	0	0	0	0	0	0	2.93	12.2	0	0
13.067	3726276	drm_qtl_snprnt100	3.91	11.2	2.45	7.2	2.42	7.1	3.31	9.6	4.25	12.2	1.76	5.2	4.86	13.7	4.18	12	1.49	6.2	0	0	0	0	0	0	2.93	12.2	3.78	14.5
13.067	3936823	drm_qtl_snprnt9	3.91	11.2	2.45	7.2	2.42	7.1	3.31	9.6	4.25	12.2	1.76	5.2	4.86	13.7	4.18	12	0	0	0	0	0	0	0	0	0	0	0	0
13.067	3716655	drm_qtl_snprnt56	3.91	11.2	2.45	7.2	2.42	7.1	3.31	9.6	4.25	12.2	1.76	5.2	4.86	13.7	4.18	12	0	0	0	0	0	0	0	0	0	0	0	0
13.684	3537492	drm_qtl_snprnt182	3.25	9.4	2.52	7.4	2.47	7.2	3	8.8	4.4	12.5	1.46	4.4	4.66	13.2	3.94	11.3	0	0	2.27	9.2	2.22	9.9	0	0	0	0	0	0
13.865	4197699	drm_qtl_snprnt23	3.6	10.4	2.27	6.7	2.76	8.1	3.51	10.2	4.37	12.5	2.35	6.9	5.11	14.3	4.53	12.9	0	0	0	0	0	0	0	0	0	0	0	0
15.151	3708686	drm_qtl_snprnt59	5.71	16	3.95	11.3	3.81	11	5.25	14.8	6.29	17.4	4.57	13	8.08	21.7	6.03	16.8	0	0	2.98	11.9	0	0	0	0	0	0	0	0
15.864	4198422	drm_qtl_snprnt27	5.36	15.1	2.34	6.9	3.06	8.9	4.62	13.1	4.15	11.9	3.41	9.9	5.93	16.4	5.12	14.5	0	0	0	0	0	0	0	0	0	0	0	0
15.864	4198414	drm_qtl_snprnt26	5.36	15.1	2.34	6.9	3.06	8.9	4.62	13.1	4.15	11.9	3.41	9.9	5.93	16.4	5.12	14.5	0	0	0	0	0	0	0	0	0	0	0	0
15.869	4197242	drm_qtl_snprnt18	5.36	15.1	2.34	6.9	3.06	8.9	4.62	13.1	4.15	11.9	3.41	9.9	5.93	16.4	5.12	14.5	0	0	0	0	0	0	0	0	0	0	4.29	16.3
15.873	4196989	drm_qtl_snprnt15	5.36	15.1	2.34	6.9	3.06	8.9	4.62	13.1	4.15	11.9	3.41	9.9	5.93	16.4	5.12	14.5	0	0	2.81	11.3	0	0	4.06	16.3	0	0	4.29	16.3
15.902	4196963	drm_qtl_snprnt14	5.36	15.1	2.34	6.9	3.06	8.9	4.62	13.1	4.15	11.9	3.41	9.9	5.93	16.4	5.12	14.5	0	0	0	0	0	0	4.06	16.3	0	0	0	0
15.933	4198453	drm_qtl_snprnt28	5.36	15.1	2.34	6.9	3.06	8.9	4.62	13.1	4.15	11.9	3.41	9.9	5.93	16.4	5.12	14.5	0	0	0	0	0	0	0	0	0	0	0	0
16.031	4197363	drm_qtl_snprnt21	5.36	15.1	2.34	6.8	3.07	8.9	4.63	13.2	4.15	11.9	3.41	9.9	5.93	16.4	5.12	14.5	0	0	0	0	0	0	0	0	0	0	4.29	16.3
24.498	6097384	TC_5399131_Lg9	1.77	5.3	2.12	6.2	2.26	6.7	3.89	11.2	2.96	8.6	1.1	3.3	3.75	10.7	3.28	9.5	1.19	5	0	0	0	0	0	0	0	0	0	0
25.921	6780589	CT_5966501_Lg9	1.13	3.4	1.67	4.9	1.63	4.8	3.03	8.8	2.63	7.7	0.66	2	2.82	8.2	2.44	7.2	0	0	1.23	5.1	0	0	0	0	0	0	0	0
26.309	6847858	AG_6024891_Lg9	1.13	3.4	1.67	4.9	1.62	4.8	3.03	8.8	2.63	7.7	0.65	2	2.82	8.2	2.44	7.2	0	0	1.23	5.1	0	0	0	0	0	0	0	0
27.749	7566047	TG_6761696_Lg9	1.02	3.1	1.57	4.6	1.48	4.4	2.71	7.9	2.43	7.1	0.34	1	2.47	7.2	1.98	5.9	0	0	0	0	0	0	0	0	0	0	0	0
27.916	7587391	AG_6782368_Lg9	0	0	0	0	0	0	0	0	0	0	0	0	0	0	0	0	0	0	0	0	0	0	1.27	5.4	0	0	0	0
29.908	8536504	GDsnp00893_Lg9	0	0	1.42	4.2	1.53	4.6	2.89	8.4	2.17	6.4	0.48	1.4	2.55	7.4	2.12	6.3	0	0	0	0	0	0	1.42	6	0	0	1.34	5.4
30.518	8043142	CA_7220033_Lg9	0	0	0	0	0	0	0	0	0	0	0	0	0	0	0	0	0	0	0	0	0	0	0	0	0	0	0	0
39.223	12564619	GDsnp00331_Lg9	1.2	3.6	0.39	1.2	1	3	2.28	6.7	1.33	4	1.81	5.4	1.69	5	1.96	5.8	0.43	1.8	0.86	3.6	0.61	2.8	0.77	3.3	1.01	4.4	0.45	1.8
43.115	13320209	CA_14233188_Lg9	4.02	11.5	0.99	3	2.68	7.8	2.83	8.3	2.41	7.1	3.47	10.1	3.49	10	2.64	7.7	0.69	2.9	3.35	13.3	2.79	12.3	1.86	7.8	3.16	13	1.86	7.4
43.322	13328116	GDsnp00958_Lg9	3.8	10.9	0.97	2.9	2.65	7.8	2.44	7.2	2.18	6.4	3.53	10.2	3.3	9.5	2.54	7.4	0.71	3	3.09	12.4	2.64	11.7	1.81	7.6	2.92	12.1	1.76	7
43.742	13433605	GA_14345081_Lg9	3.97	11.4	1.25	3.7	2.62	7.7	2.74	8	2.98	8.7	3.84	11.1	3.79	10.8	2.78	8.1	0.64	2.7	3.26	13	2.79	12.3	2	8.4	3.05	12.6	1.95	7.8
45.584	13780988	GDsnp02046_Lg9	3.92	11.3	0.83	2.5	2.59	7.6	2.27	6.7	2.44	7.2	3.35	9.7	3.15	9.1	2.33	6.9	0.65	2.8	2.97	11.9	2.56	11.4	1.78	7.5	2.84	11.8	1.84	7.3
48.756	14568980	GA_18289707_Lg9	2.08	6.1	0.18	0.5	1.92	5.7	0.93	2.8	1.31	3.9	2.15	6.3	1.51	4.5	1.73	5.1	0.88	3.7	2.71	10.9	1.99	8.9	1.17	5	1.99	8.4	1.51	6.1
49.059	14554282	GDsnp00109_Lg9	2.03	6	0.2	0.6	1.92	5.7	0.91	2.7	1.28	3.8	2.26	6.7	1.58	4.7	1.71	5.1	1.1	4.6	2.83	11.4	2.11	9.4	1.2	5.1	2.11	8.9	1.61	6.5
50.431	14795397	CA_18520824_Lg9	2.1	6.2	0.26	0.8	2.15	6.4	0.95	2.9	1.32	3.9	2.13	6.3	1.66	4.9	1.75	5.2	1.08	4.5	2.8	11.2	2.01	9	1.12	4.8	2.05	8.7	1.54	6.2
61.178	18908068	GDsnp01648_Lg9	0.75	2.2	0.01	0	0.69	2.1	0.6	1.8	0.18	0.5	0.91	2.7	0.16	0.5	0.27	0.8	0.8	3.4	1.04	4.3	0.32	1.5	0.26	1.1	0.52	2.3	0.52	2.1
61.28	19576305	GT_22371843_Lg9	0.74	2.2	0.01	0	0.69	2.1	0.6	1.8	0.18	0.6	0.9	2.7	0.16	0.5	0.27	0.8	0.79	3.3	1.04	4.3	0.31	1.5	0.26	1.1	0.52	2.3	0.51	2.1
61.729	19824467	GT_21216802_Lg9	0.66	2	0.03	0.1	0.87	2.6	0.68	2	0.41	1.3	0.61	1.8	0.13	0.4	0.27	0.8	0.73	3.1	0.91	3.8	0.51	2.4	0.15	0.7	0.43	1.9	0.48	2
62.289	20185798	AG_21581072_Lg9	0.8	2.4	0.04	0.1	0.67	2	0.4	1.2	0.31	0.9	0.77	2.3	0.08	0.2	0.17	0.5	0.77	3.3	1.04	4.3	0.74	3.4	0.3	1.3	0.44	1.9	0.67	2.8
62.942	25961454	GDsnp00053_Lg9	1.04	3.1	0.13	0.4	0.75	2.3	0.24	0.7	0.45	1.4	0.84	2.5	0.17	0.5	0.22	0.7	0.39	1.7	0.63	2.7	0.76	3.5	0.21	0.9	0.36	1.6	0.32	1.3
63.247	25981758	GA_24193344_Lg9	0.93	2.8	0.09	0.3	0.48	1.4	0.15	0.5	0.52	1.6	1	3	0.04	0.1	0.19	0.6	0.61	2.6	0.75	3.1	0.8	3.7	0.15	0.7	0.38	1.7	0.39	1.6
63.248	26015105	AG_24160721_Lg9	0.93	2.8	0.09	0.3	0.48	1.4	0.15	0.5	0.52	1.6	1	3	0.04	0.1	0.19	0.6	0.61	2.6	0.75	3.1	0.81	3.7	0.15	0.7	0.38	1.7	0.39	1.6
63.266	25986653	GT_24188449_Lg9	0.93	2.8	0.09	0.3	0.48	1.5	0.15	0.5	0.52	1.6	1.01	3	0.04	0.1	0.19	0.6	0.62	2.6	0.75	3.1	0.81	3.7	0.15	0.7	0.38	1.7	0.39	1.6
63.526	25033974	AG_24219741_Lg9	1.22	3.6	0.09	0.3	0.79	2.4	0.22	0.7	0.38	1.2	1.24	3.7	0.24	0.7	0.3	0.9	0.38	1.6	0.87	3.7	1	4.6	0.29	1.2	0.45	2	0.43	1.8
63.977	29406172	TC_29773504_Lg9	1.15	3.4	0.18	0.5	0.4	1.2	0.23	0.7	0.19	0.6	0.93	2.8	0.14	0.4	0.21	0.6	0.67	2.9	0.77	3.2	0.81	3.7	0.23	1	0.41	1.8	0.39	1.6
64.452	29439222	CT_29807663_Lg9	1.38	4.1	0.17	0.5	0.84	2.5	0.28	0.9	0.26	0.8	1.36	4.1	0.34	1	0.3	0.9	0.48	2.1	0.88	3.7	1	4.6	0.36	1.6	0.47	2.1	0.44	1.8
64.548	29372925	AG_29730777_Lg9	1.38	4.1	0.17	0.5	0.86	2.6	0.28	0.9	0.27	0.8	1.38	4.1	0.33	1	0.3	0.9	0.49	2.1	0.88	3.7	1	4.6	0.36	1.6	0.47	2.1	0.44	1.8
65.618	29915167	CT_30227604_Lg9	0.9	2.7	0.17	0.5	0.24	0.7	0.11	0.3	0.44	1.3	1.15	3.4	0.1	0.3	0.12	0.4	0.76	3.2	0.72	3	0.67	3.1	0.49	2.1	0.19	0.8	0.55	2.3
66.261	29399639	GA_29766970_Lg9	1.28	3.8	0.13	0.4	0.96	2.9	0.31	0.9	0.34	1	1.36	4.1	0.32	1	0.24	0.7	0.5	2.1	0.87	3.6	1.04	4.7	0.36	1.6	0.47	2.1	0.44	1.8
67.686	30473055	TG_35859865_Lg9	0.71	2.1	0.21	0.6	0.09	0.3	0.25	0.7	0.3	0.9	0.82	2.5	0.1	0.3	0	0.1	0.49	2.1	0.67	2.8	0.6	2.8	0.35	1.5	0.11	0.5	0.41	1.7
69.977	30332368	drm_qtl_snprnt177	1.43	4.3	0.42	1.3	0.25	0.7	0.02	0.1	0.32	1	1.36	4.1	0.31	0.9	0.23	0.7	0.6	2.6	0.65	2.7	0.58	2.7	0.36	1.6	0.14	0.6	0.5	2
* Singularity error: possiily due to more then one mathematical solution for a set of equations as refered in the MapQTL 6.0 user's manual.

## Sheet: Supp. Table 6
Supplementary Table 6. Chi-square independency test between phenotypic and genotypic association of markers for BBD. Markers, corresponding chi-square values, and p values are presented by planting site (BG and VC) and year of growing cycle.
	BG							VC
LG9 markers	2011	2012	2013	2014	2015	2016	2017	2011	2012	2014	2015	2017
TC_465054_Lg9	58,66	29,10	60,25	58,20	76,59	62,02	47,36	37,06	42,33	38,33	46,40	46,18
	<0,0001	<0,0001	<0,0001	<0,0001	<0,0001	<0,0001	<0,0001	<0,0001	<0,0001	<0,0001	<0,0001	<0,0001
TC_447971_Lg9	58,92	29,98	58,61	57,47	76,59	60,66	46,90	35,95	43,21	38,62	47,07	47,14
	<0,0001	<0,0001	<0,0001	<0,0001	<0,0001	<0,0001	<0,0001	<0,0001	<0,0001	<0,0001	<0,0001	<0,0001
CA_506758_Lg9	60,32	31,92	62,61	61,82	80,60	61,71	50,53	35,95	43,20	38,62	47,07	47,14
	<0,0001	<0,0001	<0,0001	<0,0001	<0,0001	<0,0001	<0,0001	<0,0001	<0,0001	<0,0001	<0,0001	<0,0001
TC_2334882_Lg9	46,92	22,04	38,32	45,01	72,73	55,29	42,04	33,60	36,09	27,55	43,76	42,50
	<0,0001	<0,0001	<0,0001	<0,0001	<0,0001	<0,0001	<0,0001	<0,0001	<0,0001	<0,0001	<0,0001	<0,0001
AG_1276715_Lg9	44,95	23,44	40,47	43,97	65,85	53,14	47,11	33,16	33,80	23,08	36,27	43,36
	<0,0001	<0,0001	<0,0001	<0,0001	<0,0001	<0,0001	<0,0001	<0,0001	<0,0001	<0,0001	<0,0001	<0,0001
CA_1493110_Lg9	56,36	31,95	43,38	51,92	72,80	60,89	49,35	36,56	36,48	32,33	43,62	49,60
	<0,0001	<0,0001	<0,0001	<0,0001	<0,0001	<0,0001	<0,0001	<0,0001	<0,0001	<0,0001	<0,0001	<0,0001
CT_1459011_Lg9	44,37	27,74	38,73	43,24	62,65	49,70	42,25	31,14	29,04	21,53	33,96	39,45
	<0,0001	<0,0001	<0,0001	<0,0001	<0,0001	<0,0001	<0,0001	<0,0001	<0,0001	<0,0001	<0,0001	<0,0001
GDsnp00169_Lg9	42,06	26,79	37,14	40,01	60,92	48,72	37,31	30,63	27,66	20,05	33,61	36,94
	<0,0001	<0,0001	<0,0001	<0,0001	<0,0001	<0,0001	<0,0001	<0,0001	<0,0001	<0,0001	<0,0001	<0,0001
GDsnp01573_Lg9	42,58	26,38	36,41	41,33	64,33	47,27	36,16	28,61	26,92	19,74	35,03	36,63
	<0,0001	<0,0001	<0,0001	<0,0001	<0,0001	<0,0001	<0,0001	<0,0001	<0,0001	<0,0001	<0,0001	<0,0001
GA_3788429_Lg9	16,52	11,70	8,59	14,59	32,48	20,63	15,16	14,23	12,99	7,55	10,86	13,23
	0,0024	0,0197	0,0721	0,0056	<0,0001	0,0004	0,0044	0,0066	0,0113	0,1092	0,0282	0,0102
drm_qtl_snprnt113	25,39	16,77	12,51	22,72	40,38	27,38	23,58	12,75	19,03	10,38	25,00	18,95
	<0,0001	0,0021	0,0139	0,0001	<0,0001	<0,0001	<0,0001	0,00126	0,0008	0,0344	<0,0001	0,0008
drm_qtl_snprnt115	17,17	12,20	9,83	13,79	29,46	19,05	21,29	14,79	17,51	6,62	17,98	12,80
	0,0018	0,0159	0,0434	0,008	<0,0001	0,0008	0,0003	0,0052	0,0015	0,1571	0,0012	0,0123
drm_qtl_snprnt112	14,98	14,18	9,00	12,94	28,51	16,94	20,29	15,27	15,13	6,57	17,49	12,75
	0,0047	0,0067	0,0611	0,0116	<0,0001	0,002	0,0004	0,0042	0,0044	0,1603	0,0016	0,0126
drm_qtl_snprnt137	17,30	12,02	9,71	13,77	29,55	19,10	20,84	12,73	16,40	6,56	18,07	12,78
	0,0017	0,0172	0,0456	0,0081	<0,0001	0,0008	0,0003	0,0127	0,0025	0,1609	0,0012	0,0124
drm_qtl_snprnt134	19,62	14,91	10,81	16,48	35,36	23,91	22,99	13,28	17,20	7,06	17,46	12,93
	0,0006	0,0049	0.0288	0,0024	<0,0001	<0,0001	0,0001	0,01	0,0018	0,1328	0,0016	0,0116

## Sheet: Supp. Table 7
Supplementary Table 7. Wilcoxon-rank test to test if genes that belong to one category do not differ in their ranks from genes that do not belong to the category. The average LOD for the trait by marker in the MapQTL6 analysis using the phenotypic traits assessment from site locations BG and VC was used as a measure of choice to rank the genes (see Supplementary Table 5).
Germplasm	Site_location	Ontology	Term	Term_description	p_high_ranks_after_refinement	id_of_genes_annotated_to_ontology_term_MalDom1.0	id_of_genes_annotated_to_ontology_term_GDDH13.1.1
M13	BEG	biological_process	GO:0055085	transmembrane transport	0.000531225	MDP0000250518,MDP0000320690	MD09G1047200,MD09G1047300,MD09G1049400
M13	BEG	molecular_function	GO:0008308	voltage-gated anion channel activity	0.00432224	MDP0000250518	MD09G1047200,MD09G1047300
M13	BEG	biological_process	GO:0006820	anion transport	0.0047267	MDP0000250518	MD09G1047200,MD09G1047300
M13	BEG	biological_process	GO:0016998	cell wall macromolecule catabolic process	0.0047267	MDP0000517518	MD09G1047100
M13	BEG	molecular_function	GO:0042626	ATPase activity, coupled to transmembrane movement of substances	0.0351128	MDP0000320690	MD09G1049400
M13	BEG	molecular_function	GO:0019843	rRNA binding	0.0351128	MDP0000232369	MD09G1049700
M13	BEG	molecular_function	GO:0005198	structural molecule activity	0.0351128	MDP0000832105	MD09G1049500
M13	BEG	cellular_component	GO:0016021	integral component of membrane	0.0364636	MDP0000191787,MDP0000250518,MDP0000320690,MDP0000242101	MD09G1056300,MD09G1047200,MD09G1047300,MD09G1049400,MD09G1005300
M13	BEG	biological_process	GO:0007018	microtubule-based movement	0.0397112	MDP0000832105	MD09G1049500
M13	BEG	biological_process	GO:0051258	protein polymerization	0.0397112	MDP0000832105	MD09G1049500
M13	BEG	cellular_component	GO:0005741	mitochondrial outer membrane	0.0455953	MDP0000250518	MD09G1047200,MD09G1047300
Germplasm	Site_location	Ontology	Term	Term_description	p_high_ranks_after_refinement	id_of_genes_annotated_to_ontology_term_MalDom1.0	id_of_genes_annotated_to_ontology_term_GDDH13.1.1
M13	VAC	biological_process	GO:0055085	transmembrane transport	5.62466e-05	MDP0000250518,MDP0000320690	MD09G1047200,MD09G1047300,MD09G1049400
M13	VAC	biological_process	GO:0006820	anion transport	0.00110018	MDP0000250518	MD09G1047200,MD09G1047300
M13	VAC	biological_process	GO:0016998	cell wall macromolecule catabolic process	0.00110018	MDP0000517518	MD09G1047100
M13	VAC	molecular_function	GO:0008308	voltage-gated anion channel activity	0.00122396	MDP0000250518	MD09G1047200,MD09G1047300
M13	VAC	cellular_component	GO:0016021	integral component of membrane	0.00919388	MDP0000191787,MDP0000250518,MDP0000320690,MDP0000242101	MD09G1056300,MD09G1047200,MD09G1047300,MD09G1049400,MD09G1005300
M13	VAC	molecular_function	GO:0042626	ATPase activity, coupled to transmembrane movement of substances	0.0183567	MDP0000320690	MD09G1049400
M13	VAC	molecular_function	GO:0019843	rRNA binding	0.0183567	MDP0000232369	MD09G1049700
M13	VAC	molecular_function	GO:0005198	structural molecule activity	0.0183567	MDP0000832105	MD09G1049500
M13	VAC	biological_process	GO:0007018	microtubule-based movement	0.019255	MDP0000832105	MD09G1049500
M13	VAC	biological_process	GO:0051258	protein polymerization	0.019255	MDP0000832105	MD09G1049500
M13	VAC	cellular_component	GO:0005741	mitochondrial outer membrane	0.0361049	MDP0000250518	MD09G1047200,MD09G1047300

## Sheet: Supp. Table 8
Supplementary Table 8. List of gene models of the BBD QTL interval inspected for prioritizing candidate genes. Gene models are listed with corresponding function description, localization and links to the apple genome and epigenome database. Lines indicated in yellow refers to MdoICE1, MdoMPT, MdoFLC and MdoPRE1 candidate genes respectively.
Apple v.3 genome predicted transcript name	Apple v.3 genome predicted transcript hypelink	Description	Localization	Apple v.3 localization hyperlink
MD09G1001500	MD09G1001500	K+ uptake transporter 3	Chr09:205384..216338	Chr09:205384..216338
MD09G1001600	MD09G1001600	nudix hydrolase homolog 13	Chr09:221164..223151	Chr09:221164..223151
MD09G1001700	MD09G1001700	Mitochondrial substrate carrier family protein	Chr09:232853..233840	Chr09:232853..233840
MD09G1001800	MD09G1001800	Mitochondrial substrate carrier family protein	Chr09:233933..234767	Chr09:233933..234767
MD09G1001900	MD09G1001900	Protein kinase superfamily protein	Chr09:242509..245963	Chr09:242509..245963
MD09G1002000	MD09G1002000	Protein of unknown function (DUF677)	Chr09:246105..248676	Chr09:246105..248676
MD09G1002100	MD09G1002100	Protein of unknown function (DUF3754)	Chr09:248701..251992	Chr09:248701..251992
MD09G1002200	MD09G1002200	Protein of unknown function	Chr09:253008..258833	Chr09:253008..258833
MD09G1002300	MD09G1002300	Acyl-CoA N-acyltransferases (NAT) superfamily protein	Chr09:260742..261795	Chr09:260742..261795
MD09G1002400	MD09G1002400	Ubiquinol-cytochrome C reductase iron-sulfur subunit	Chr09:262818..264281	Chr09:262818..264281
MD09G1002500	MD09G1002500	cofactor assembly of complex C	Chr09:264617..266487	Chr09:264617..266487
MD09G1002600	MD09G1002600	SU(VAR)3-9 homolog 4	Chr09:276858..283702	Chr09:276858..283702
MD09G1002700	MD09G1002700	Protein of unknown function	Chr09:283930..285638	Chr09:283930..285638
MD09G1002800	MD09G1002800	Glycosyl hydrolase family 38 protein	Chr09:285840..302929	Chr09:285840..302929
MD09G1002900	MD09G1002900	Glycosyl hydrolase family 38 protein	Chr09:303550..311619	Chr09:303550..311619
MD09G1003000	MD09G1003000	RING/U-box superfamily protein	Chr09:312537..316327	Chr09:312537..316327
MD09G1003100	MD09G1003100	RING/U-box superfamily protein	Chr09:318452..318568	Chr09:318452..318568
MD09G1003200	MD09G1003200	RING/U-box superfamily protein	Chr09:318804..318921	Chr09:318804..318921
MD09G1003300	MD09G1003300	RING/U-box superfamily protein	Chr09:319713..319868	Chr09:319713..319868
MD09G1003400	MD09G1003400	MALE GAMETOPHYTE DEFECTIVE 2	Chr09:322402..326249	Chr09:322402..326249
MD09G1003500	MD09G1003500	Pentatricopeptide repeat (PPR) superfamily protein	Chr09:326648..328389	Chr09:326648..328389
MD09G1003600	MD09G1003600	Pentatricopeptide repeat (PPR) superfamily protein	Chr09:328390..330612	Chr09:328390..330612
MD09G1003700	MD09G1003700	aspartate kinase 3	Chr09:330614..334768	Chr09:330614..334768
MD09G1003800	MD09G1003800	basic helix-loop-helix (bHLH) DNA-binding superfamily protein	Chr09:335087..338411	Chr09:335087..338411
MD09G1003900	MD09G1003900	NAD(P)-binding Rossmann-fold superfamily protein	Chr09:340974..343728	Chr09:340974..343728
MD09G1004000	MD09G1004000	Phosphoglycerate mutase family protein	Chr09:346020..348666	Chr09:346020..348666
MD09G1004100	MD09G1004100	Phosphoglycerate mutase family protein	Chr09:353634..359361	Chr09:353634..359361
MD09G1004200	MD09G1004200	Protein of unknown function	Chr09:363697..364103	Chr09:363697..364103
MD09G1004300	MD09G1004300	Tetratricopeptide repeat (TPR)-like superfamily protein	Chr09:364694..366289	Chr09:364694..366289
MD09G1004400	MD09G1004400	phosphate transporter 3	Chr09:368273..371719	Chr09:368273..371719
MD09G1004500	MD09G1004500	vacuolar ATP synthase subunit C (VATC) / V-ATPase C subunit / vacuolar proton pump C subunit (DET3)	Chr09:371979..375530	Chr09:371979..375530
MD09G1004600	MD09G1004600	vacuolar ATP synthase subunit C (VATC) / V-ATPase C subunit / vacuolar proton pump C subunit (DET3)	Chr09:375946..376033	Chr09:375946..376033
MD09G1004700	MD09G1004700	AP2/B3-like transcriptional factor family protein	Chr09:376431..378955	Chr09:376431..378955
MD09G1004800	MD09G1004800	long chain base2	Chr09:381026..385342	Chr09:381026..385342
MD09G1004900	MD09G1004900	Protein of unknown function	Chr09:386551..387118	Chr09:386551..387118
MD09G1005000	MD09G1005000	auxin signaling F-box 3	Chr09:395068..398384	Chr09:395068..398384
MD09G1005100	MD09G1005100	Protein of unknown function	Chr09:398596..400590	Chr09:398596..400590
MD09G1005200	MD09G1005200	GRAM domain family protein	Chr09:402081..404041	Chr09:402081..404041
MD09G1005300	MD09G1005300	translocon-associated protein beta (TRAPB) family protein	Chr09:404142..406757	Chr09:404142..406757
MD09G1005400	MD09G1005400	translocon-associated protein beta (TRAPB) family protein	Chr09:408037..408475	Chr09:408037..408475
MD09G1005500	MD09G1005500	translocon-associated protein beta (TRAPB) family protein	Chr09:422508..424186	Chr09:422508..424186
MD09G1005600	MD09G1005600	Endosomal targeting BRO1-like domain-containing protein	Chr09:425142..426281	Chr09:425142..426281
MD09G1005700	MD09G1005700	Uncharacterised protein family (UPF0497)	Chr09:426516..427802	Chr09:426516..427802
MD09G1005800	MD09G1005800	Esterase/lipase/thioesterase family protein	Chr09:432007..437619	Chr09:432007..437619
MD09G1005900	MD09G1005900	C2H2 and C2HC zinc fingers superfamily protein	Chr09:441272..442223	Chr09:441272..442223
MD09G1006000	MD09G1006000	Protein of unknown function	Chr09:446605..450712	Chr09:446605..450712
MD09G1006100	MD09G1006100	shikimate kinase like 1	Chr09:452445..454737	Chr09:452445..454737
MD09G1006200	MD09G1006200	hydroxyproline-rich glycoprotein family protein	Chr09:455367..460595	Chr09:455367..460595
MD09G1006300	MD09G1006300	hydroxyproline-rich glycoprotein family protein	Chr09:465770..467095	Chr09:465770..467095
MD09G1006400	MD09G1006400	NAC domain containing protein 83	Chr09:470175..471943	Chr09:470175..471943
MD09G1006500	MD09G1006500	senescence-related gene 3	Chr09:475500..478080	Chr09:475500..478080
MD09G1006600	MD09G1006600	dsRNA-binding protein 5	Chr09:483453..485718	Chr09:483453..485718
MD09G1006700	MD09G1006700	DHHC-type zinc finger family protein	Chr09:487223..490996	Chr09:487223..490996
MD09G1006800	MD09G1006800	DHHC-type zinc finger family protein	Chr09:493262..493937	Chr09:493262..493937
MD09G1006900	MD09G1006900	Protein kinase superfamily protein	Chr09:493938..497583	Chr09:493938..497583
MD09G1007000	MD09G1007000	Protein of unknown function	Chr09:498402..501433	Chr09:498402..501433
MD09G1007100	MD09G1007100	exocyst subunit exo70 family protein C2	Chr09:503051..505475	Chr09:503051..505475
MD09G1007200	MD09G1007200	RGA-like 1	Chr09:510028..513274	Chr09:510028..513274
MD09G1007300	MD09G1007300	membrane-anchored ubiquitin-fold protein 4 precursor	Chr09:514576..518001	Chr09:514576..518001
MD09G1007400	MD09G1007400	Thioredoxin superfamily protein	Chr09:524569..524950	Chr09:524569..524950
MD09G1007500	MD09G1007500	ENTH/VHS family protein	Chr09:532164..537988	Chr09:532164..537988
MD09G1007600	MD09G1007600	HXXXD-type acyl-transferase family protein	Chr09:539011..541142	Chr09:539011..541142
MD09G1007700	MD09G1007700	actin related protein 2	Chr09:542049..546035	Chr09:542049..546035
MD09G1007800	MD09G1007800	Ribosomal protein L7Ae/L30e/S12e/Gadd45 family protein	Chr09:546213..548019	Chr09:546213..548019
MD09G1007900	MD09G1007900	GYF domain-containing protein	Chr09:549094..556311	Chr09:549094..556311
MD09G1008000	MD09G1008000	Tetratricopeptide repeat (TPR)-like superfamily protein	Chr09:556312..558773	Chr09:556312..558773
MD09G1008100	MD09G1008100	ACT domain repeat 6	Chr09:559745..563210	Chr09:559745..563210
MD09G1008200	MD09G1008200	ACT domain repeat 6	Chr09:578387..580203	Chr09:578387..580203
MD09G1008300	MD09G1008300	TEOSINTE BRANCHED 1	Chr09:580204..581231	Chr09:580204..581231
MD09G1008400	MD09G1008400	YELLOW STRIPE like 6	Chr09:592128..596818	Chr09:592128..596818
MD09G1008500	MD09G1008500	Protein of unknown function	Chr09:600147..600999	Chr09:600147..600999
MD09G1008600	MD09G1008600	translocase inner membrane subunit 44-2	Chr09:604339..605141	Chr09:604339..605141
MD09G1008700	MD09G1008700	NAD(P)-binding Rossmann-fold superfamily protein	Chr09:605573..608154	Chr09:605573..608154
MD09G1008800	MD09G1008800	WRKY DNA-binding protein 75	Chr09:616601..619344	Chr09:616601..619344
MD09G1008900	MD09G1008900	Squamosa promoter-binding protein-like (SBP domain) transcription factor family protein	Chr09:635527..637768	Chr09:635527..637768
MD09G1009000	MD09G1009000	Squamosa promoter-binding protein-like (SBP domain) transcription factor family protein	Chr09:638736..638842	Chr09:638736..638842
MD09G1009100	MD09G1009100	K-box region and MADS-box transcription factor family protein	Chr09:651154..663313	Chr09:651154..663313
MD09G1009200	MD09G1009200	Protein of unknown function (DUF 3339)	Chr09:664530..664740	Chr09:664530..664740
MD09G1044700	MD09G1044700	cysteine-rich RLK (RECEPTOR-like protein kinase) 8	Chr09:2894279..2896768	Chr09:2894279..2896768
MD09G1044800	MD09G1044800	Disease resistance protein (TIR-NBS-LRR class) family	Chr09:2897995..2907439	Chr09:2897995..2907439
MD09G1044900	MD09G1044900	Disease resistance protein (TIR-NBS-LRR class) family	Chr09:2916382..2917151	Chr09:2916382..2917151
MD09G1045000	MD09G1045000	ARM repeat superfamily protein	Chr09:2936872..2937199	Chr09:2936872..2937199
MD09G1045100	MD09G1045100	Disease resistance protein (TIR-NBS-LRR class) family	Chr09:2938461..2943883	Chr09:2938461..2943883
MD09G1045200	MD09G1045200	Disease resistance protein (TIR-NBS-LRR class) family	Chr09:2943884..2944691	Chr09:2943884..2944691
MD09G1045300	MD09G1045300	Sucrase/ferredoxin-like family protein	Chr09:2952526..2954012	Chr09:2952526..2954012
MD09G1045400	MD09G1045400	Protein kinase superfamily protein	Chr09:2956927..2959066	Chr09:2956927..2959066
MD09G1045500	MD09G1045500	LOB domain-containing protein 27	Chr09:2960397..2961501	Chr09:2960397..2961501
MD09G1045600	MD09G1045600	Protein of unknown function (DUF569)	Chr09:2963826..2964832	Chr09:2963826..2964832
MD09G1045700	MD09G1045700	Phosphoglycerate mutase-like family protein	Chr09:3005981..3007177	Chr09:3005981..3007177
MD09G1045800	MD09G1045800	thioredoxin 2	Chr09:3007178..3008550	Chr09:3007178..3008550
MD09G1045900	MD09G1045900	Protein of unknown function (DUF185)	Chr09:3008926..3011922	Chr09:3008926..3011922
MD09G1046000	MD09G1046000	Protein of unknown function (DUF185)	Chr09:3011997..3012072	Chr09:3011997..3012072
MD09G1046100	MD09G1046100	CLP-similar protein 3	Chr09:3015204..3017375	Chr09:3015204..3017375
MD09G1046200	MD09G1046200	CLP-similar protein 3	Chr09:3017376..3020481	Chr09:3017376..3020481
MD09G1046300	MD09G1046300	CLP-similar protein 3	Chr09:3021006..3022379	Chr09:3021006..3022379
MD09G1046400	MD09G1046400	HAD-superfamily hydrolase	Chr09:3033192..3037488	Chr09:3033192..3037488
MD09G1046500	MD09G1046500	CLP-similar protein 3	Chr09:3046553..3049452	Chr09:3046553..3049452
MD09G1046600	MD09G1046600	Protein kinase superfamily protein	Chr09:3079820..3083142	Chr09:3079820..3083142
MD09G1046700	MD09G1046700	SPFH/Band 7/PHB domain-containing membrane-associated protein family	Chr09:3084440..3085237	Chr09:3084440..3085237
MD09G1046800	MD09G1046800	SPFH/Band 7/PHB domain-containing membrane-associated protein family	Chr09:3085238..3085887	Chr09:3085238..3085887
MD09G1046900	MD09G1046900	SPFH/Band 7/PHB domain-containing membrane-associated protein family	Chr09:3086909..3088504	Chr09:3086909..3088504
MD09G1047000	MD09G1047000	SPFH/Band 7/PHB domain-containing membrane-associated protein family	Chr09:3088868..3090944	Chr09:3088868..3090944
MD09G1047100	MD09G1047100	glycosyl hydrolase family 81 protein	Chr09:3091076..3093125	Chr09:3091076..3093125
MD09G1047200	MD09G1047200	voltage dependent anion channel 1	Chr09:3093746..3096449	Chr09:3093746..3096449
MD09G1047300	MD09G1047300	Auxin efflux carrier family protein	Chr09:3099048..3101173	Chr09:3099048..3101173
MD09G1047400	MD09G1047400	Pectate lyase family protein	Chr09:3107181..3109599	Chr09:3107181..3109599
MD09G1047500	MD09G1047500	high mobility group	Chr09:3111088..3116909	Chr09:3111088..3116909
MD09G1047600	MD09G1047600	Integrase-type DNA-binding superfamily protein	Chr09:3119207..3121168	Chr09:3119207..3121168
MD09G1047700	MD09G1047700	Protein of unknown function	Chr09:3131217..3133318	Chr09:3131217..3133318
MD09G1047800	MD09G1047800	Integrase-type DNA-binding superfamily protein	Chr09:3134374..3136032	Chr09:3134374..3136032
MD09G1047900	MD09G1047900	TBP-associated factor 5	Chr09:3136411..3138936	Chr09:3136411..3138936
MD09G1048000	MD09G1048000	ATPase	Chr09:3140793..3144484	Chr09:3140793..3144484
MD09G1048100	MD09G1048100	Protein of unknown function (DUF1637)	Chr09:3154697..3158053	Chr09:3154697..3158053
MD09G1048200	MD09G1048200	WRKY DNA-binding protein 72	Chr09:3163313..3164509	Chr09:3163313..3164509
MD09G1048300	MD09G1048300	WRKY DNA-binding protein 72	Chr09:3166929..3174316	Chr09:3166929..3174316
MD09G1048400	MD09G1048400	Small GTP-binding protein	Chr09:3174698..3179042	Chr09:3174698..3179042
MD09G1048500	MD09G1048500	Polyvinylalcohol dehydrogenase	Chr09:3181719..3183234	Chr09:3181719..3183234
MD09G1048600	MD09G1048600	Polyvinylalcohol dehydrogenase	Chr09:3183710..3185593	Chr09:3183710..3185593
MD09G1048700	MD09G1048700	Polyvinylalcohol dehydrogenase	Chr09:3195437..3198556	Chr09:3195437..3198556
MD09G1048800	MD09G1048800	Protein of unknown function	Chr09:3207293..3210248	Chr09:3207293..3210248
MD09G1048900	MD09G1048900	Protein kinase superfamily protein	Chr09:3210535..3214897	Chr09:3210535..3214897
MD09G1049000	MD09G1049000	homeobox 3	Chr09:3227307..3229709	Chr09:3227307..3229709
MD09G1049100	MD09G1049100	Glutaredoxin family protein	Chr09:3246449..3247754	Chr09:3246449..3247754
MD09G1049200	MD09G1049200	RNA-binding (RRM/RBD/RNP motifs) family protein	Chr09:3252840..3257435	Chr09:3252840..3257435
MD09G1049300	MD09G1049300	basic helix-loop-helix (bHLH) DNA-binding family protein	Chr09:3280093..3281655	Chr09:3280093..3281655
MD09G1049400	MD09G1049400	ATP binding cassette subfamily B19	Chr09:3292856..3300155	Chr09:3292856..3300155
MD09G1049500	MD09G1049500	tubulin alpha-2 chain	Chr09:3306192..3308461	Chr09:3306192..3308461
MD09G1049600	MD09G1049600	Protein of unknown function	Chr09:3308505..3309818	Chr09:3308505..3309818
MD09G1049700	MD09G1049700	Ribosomal protein S4	Chr09:3311383..3313554	Chr09:3311383..3313554
MD09G1049800	MD09G1049800	cullin 3	Chr09:3316045..3319861	Chr09:3316045..3319861
MD09G1049900	MD09G1049900	Protein of unknown function	Chr09:3322200..3329566	Chr09:3322200..3329566
MD09G1050000	MD09G1050000	NAP1-related protein 2	Chr09:3330295..3333793	Chr09:3330295..3333793
MD09G1050100	MD09G1050100	NAP1-related protein 2	Chr09:3335203..3336526	Chr09:3335203..3336526
MD09G1050200	MD09G1050200	NAP1-related protein 2	Chr09:3339714..3339785	Chr09:3339714..3339785
MD09G1050300	MD09G1050300	Ankyrin repeat family protein	Chr09:3340081..3347043	Chr09:3340081..3347043
MD09G1050400	MD09G1050400	NAC domain containing protein 94	Chr09:3348227..3349899	Chr09:3348227..3349899
MD09G1050500	MD09G1050500	Trypsin family protein with PDZ domain	Chr09:3355524..3359437	Chr09:3355524..3359437
MD09G1050600	MD09G1050600	Ribosomal protein L34e superfamily protein	Chr09:3360288..3362180	Chr09:3360288..3362180
MD09G1050700	MD09G1050700	Protein of unknown function (DUF1666)	Chr09:3363793..3367599	Chr09:3363793..3367599
MD09G1050800	MD09G1050800	Protein of unknown function (DUF1666)	Chr09:3371456..3371568	Chr09:3371456..3371568
MD09G1050900	MD09G1050900	Protein of unknown function (DUF1666)	Chr09:3373756..3373872	Chr09:3373756..3373872
MD09G1051000	MD09G1051000	myb domain protein 30	Chr09:3374968..3377073	Chr09:3374968..3377073
MD09G1051100	MD09G1051100	mini zinc finger 2	Chr09:3395077..3395350	Chr09:3395077..3395350
MD09G1051200	MD09G1051200	homeobox protein 34	Chr09:3408794..3409856	Chr09:3408794..3409856
MD09G1051300	MD09G1051300	GAST1 protein homolog 4	Chr09:3433033..3434511	Chr09:3433033..3434511
MD09G1051400	MD09G1051400	RING/FYVE/PHD zinc finger superfamily protein	Chr09:3436191..3437142	Chr09:3436191..3437142
MD09G1051500	MD09G1051500	NOD26-like intrinsic protein 1	Chr09:3445578..3448777	Chr09:3445578..3448777
MD09G1051600	MD09G1051600	Transmembrane amino acid transporter family protein	Chr09:3455329..3457351	Chr09:3455329..3457351
MD09G1051700	MD09G1051700	Pentatricopeptide repeat (PPR) superfamily protein	Chr09:3457683..3459201	Chr09:3457683..3459201
MD09G1051800	MD09G1051800	FTSH protease 6	Chr09:3459563..3462639	Chr09:3459563..3462639
MD09G1051900	MD09G1051900	Protein of unknown function (DUF679)	Chr09:3463786..3464494	Chr09:3463786..3464494
MD09G1052000	MD09G1052000	starch synthase 2	Chr09:3471277..3475714	Chr09:3471277..3475714
MD09G1052100	MD09G1052100	Domain of unknown function (DUF298)	Chr09:3476408..3479500	Chr09:3476408..3479500
MD09G1052200	MD09G1052200	RING/U-box superfamily protein	Chr09:3480451..3480853	Chr09:3480451..3480853
MD09G1052300	MD09G1052300	Pentatricopeptide repeat (PPR-like) superfamily protein	Chr09:3483242..3485363	Chr09:3483242..3485363
MD09G1052400	MD09G1052400	Ribosomal protein L34e superfamily protein	Chr09:3488329..3489186	Chr09:3488329..3489186
MD09G1052500	MD09G1052500	Ribosomal protein L34e superfamily protein	Chr09:3500038..3502715	Chr09:3500038..3502715
MD09G1052600	MD09G1052600	Ribosomal protein L34e superfamily protein	Chr09:3505458..3506382	Chr09:3505458..3506382
MD09G1052700	MD09G1052700	Calcium-binding EF-hand family protein	Chr09:3508789..3509419	Chr09:3508789..3509419
MD09G1052800	MD09G1052800	Pentatricopeptide repeat (PPR) superfamily protein	Chr09:3509800..3512245	Chr09:3509800..3512245
MD09G1053100	MD09G1053100	RNA-binding KH domain-containing protein	Chr09:3528514..3533532	Chr09:3528514..3533532
MD09G1053200	MD09G1053200	RNA-binding KH domain-containing protein	Chr09:3536815..3537053	Chr09:3536815..3537053
MD09G1053300	MD09G1053300	Protein of unknown function	Chr09:3538172..3538334	Chr09:3538172..3538334
MD09G1053400	MD09G1053400	Pentatricopeptide repeat (PPR) superfamily protein	Chr09:3539619..3543824	Chr09:3539619..3543824
MD09G1053500	MD09G1053500	Uncharacterised protein family (UPF0497)	Chr09:3545080..3546104	Chr09:3545080..3546104
MD09G1053600	MD09G1053600	Pentatricopeptide repeat (PPR) superfamily protein	Chr09:3547823..3549443	Chr09:3547823..3549443
MD09G1053700	MD09G1053700	NAC domain containing protein 100	Chr09:3559687..3561425	Chr09:3559687..3561425
MD09G1053800	MD09G1053800	NAC domain containing protein 100	Chr09:3571578..3571694	Chr09:3571578..3571694
MD09G1053900	MD09G1053900	eukaryotic initiation factor 4A-III	Chr09:3574141..3577121	Chr09:3574141..3577121
MD09G1054000	MD09G1054000	myb domain protein 16	Chr09:3584455..3587147	Chr09:3584455..3587147
MD09G1054100	MD09G1054100	myb domain protein 16	Chr09:3595056..3596882	Chr09:3595056..3596882
MD09G1054200	MD09G1054200	Pyridoxal phosphate (PLP)-dependent transferases superfamily protein	Chr09:3607934..3611722	Chr09:3607934..3611722
MD09G1054300	MD09G1054300	SPX domain gene 4	Chr09:3612655..3615230	Chr09:3612655..3615230
MD09G1054400	MD09G1054400	EXS (ERD1/XPR1/SYG1) family protein	Chr09:3615916..3620025	Chr09:3615916..3620025
MD09G1054500	MD09G1054500	emp24/gp25L/p24 family/GOLD family protein	Chr09:3623820..3626365	Chr09:3623820..3626365
MD09G1054600	MD09G1054600	mitochondrial editing factor 21	Chr09:3626750..3628238	Chr09:3626750..3628238
MD09G1054700	MD09G1054700	Protein of unknown function	Chr09:3628567..3630948	Chr09:3628567..3630948
MD09G1054800	MD09G1054800	glycine-rich protein	Chr09:3632348..3638432	Chr09:3632348..3638432
MD09G1054900	MD09G1054900	pectin methylesterase 31	Chr09:3638852..3653949	Chr09:3638852..3653949
MD09G1055000	MD09G1055000	Protein of unknown function (DUF1997)	Chr09:3656570..3658237	Chr09:3656570..3658237
MD09G1055100	MD09G1055100	Protein of unknown function (DUF1997)	Chr09:3658238..3658314	Chr09:3658238..3658314
MD09G1055200	MD09G1055200	Pentatricopeptide repeat (PPR) superfamily protein	Chr09:3659222..3659941	Chr09:3659222..3659941
MD09G1055300	MD09G1055300	pectin methylesterase 31	Chr09:3670012..3670872	Chr09:3670012..3670872
MD09G1055400	MD09G1055400	Protein of unknown function (DUF1997)	Chr09:3680677..3681978	Chr09:3680677..3681978
MD09G1055500	MD09G1055500	Protein of unknown function (DUF1997)	Chr09:3682267..3682344	Chr09:3682267..3682344
MD09G1055600	MD09G1055600	Pentatricopeptide repeat (PPR) superfamily protein	Chr09:3683709..3684117	Chr09:3683709..3684117
MD09G1055700	MD09G1055700	Vesicle transport v-SNARE family protein	Chr09:3684840..3695612	Chr09:3684840..3695612
MD09G1055800	MD09G1055800	Disease resistance protein (CC-NBS-LRR class) family	Chr09:3700656..3703464	Chr09:3700656..3703464
MD09G1055900	MD09G1055900	hypothetical protein 1	Chr09:3704909..3710875	Chr09:3704909..3710875
MD09G1056000	MD09G1056000	related to AP2 11	Chr09:3715626..3716889	Chr09:3715626..3716889
MD09G1056100	MD09G1056100	related to AP2 11	Chr09:3718533..3719818	Chr09:3718533..3719818
MD09G1056200	MD09G1056200	SNF1 kinase homolog 10	Chr09:3719819..3723909	Chr09:3719819..3723909
MD09G1056300	MD09G1056300	Eukaryotic protein of unknown function (DUF872)	Chr09:3724573..3726732	Chr09:3724573..3726732
MD09G1056400	MD09G1056400	Protein of unknown function (DUF1336)	Chr09:3731314..3734042	Chr09:3731314..3734042
MD09G1056500	MD09G1056500	CDC2C	Chr09:3735835..3739631	Chr09:3735835..3739631
MD09G1056600	MD09G1056600	WRKY DNA-binding protein 3	Chr09:3741353..3745516	Chr09:3741353..3745516
MD09G1056700	MD09G1056700	Domain of unknown function (DUF3598)	Chr09:3750069..3752688	Chr09:3750069..3752688
MD09G1056800	MD09G1056800	RNI-like superfamily protein	Chr09:3753657..3753957	Chr09:3753657..3753957
MD09G1056900	MD09G1056900	RNI-like superfamily protein	Chr09:3760602..3762718	Chr09:3760602..3762718
MD09G1057000	MD09G1057000	RNI-like superfamily protein	Chr09:3765644..3766813	Chr09:3765644..3766813
MD09G1057100	MD09G1057100	Domain of unknown function (DUF3598)	Chr09:3767163..3768745	Chr09:3767163..3768745
MD09G1057200	MD09G1057200	homologue of bacterial MinE 1	Chr09:3777283..3778891	Chr09:3777283..3778891
MD09G1057300	MD09G1057300	RNI-like superfamily protein	Chr09:3780483..3781026	Chr09:3780483..3781026
MD09G1057400	MD09G1057400	Phosphoglycerate mutase family protein	Chr09:3793686..3795943	Chr09:3793686..3795943
MD09G1057500	MD09G1057500	early nodulin-like protein 17	Chr09:3807264..3809156	Chr09:3807264..3809156
MD09G1057600	MD09G1057600	early nodulin-like protein 17	Chr09:3810910..3812153	Chr09:3810910..3812153
MD09G1057700	MD09G1057700	chorismate mutase 1	Chr09:3813181..3816621	Chr09:3813181..3816621
MD09G1057800	MD09G1057800	P-loop containing nucleoside triphosphate hydrolases superfamily protein	Chr09:3822402..3826097	Chr09:3822402..3826097
MD09G1057900	MD09G1057900	P-loop containing nucleoside triphosphate hydrolases superfamily protein	Chr09:3827546..3827664	Chr09:3827546..3827664
MD09G1058000	MD09G1058000	chorismate mutase 1	Chr09:3828803..3830228	Chr09:3828803..3830228
MD09G1058100	MD09G1058100	Ca2+ activated outward rectifying K+ channel 5	Chr09:3833346..3833937	Chr09:3833346..3833937
MD09G1058200	MD09G1058200	Ca2+ activated outward rectifying K+ channel 5	Chr09:3872443..3872561	Chr09:3872443..3872561
MD09G1058300	MD09G1058300	Ca2+ activated outward rectifying K+ channel 5	Chr09:3872791..3872917	Chr09:3872791..3872917
MD09G1058400	MD09G1058400	Ca2+ activated outward rectifying K+ channel 6	Chr09:3879897..3880758	Chr09:3879897..3880758
MD09G1058500	MD09G1058500	Tetratricopeptide repeat (TPR)-like superfamily protein	Chr09:3891750..3892008	Chr09:3891750..3892008
MD09G1058600	MD09G1058600	Tetratricopeptide repeat (TPR)-like superfamily protein	Chr09:3892051..3892917	Chr09:3892051..3892917
MD09G1058700	MD09G1058700	Outward rectifying potassium channel protein	Chr09:3894526..3895828	Chr09:3894526..3895828
MD09G1058800	MD09G1058800	Tetratricopeptide repeat (TPR)-like superfamily protein	Chr09:3900989..3901328	Chr09:3900989..3901328
MD09G1058900	MD09G1058900	Protein of unknown function (DUF179)	Chr09:3901643..3902501	Chr09:3901643..3902501

## Sheet: Suup. Table 9
Supplementary Table 9. List of primers used for RT-qPCR analysis.
Gene name	Genome accession codea	Primers (5’-3’)b
MdoIce1	MD09G1003800	GTCTGCTCCAACCCTTTTGA
		GCCGTGAAACCCATCAGAAC
MdoDAM1	MD15G1384500	GGAGAAGGGGGATTTTCAAGA
		CGTGATGAATCGTGGGTTGA
MdoCBF1	MD07G1262900	AACGCCAAGGACATTCAGAC
		CCACAGGAGATCCACAAACC
MdoCBF2	MD06G1072200	GCTTGTGTCGTCGGAACTC
		GCTCAATTTCTCCGACGCAG
MdoCBF3	MD01G1196100	AGGCTTGTGGTGCTTCTG
		CCGCTTCCTCATCCATAAAA
aGenome accession codes are provided by the ‘Malus domestica Genome’ v.3 (http://rosaceae.org/) database. bPrimers forward and reverse used in RT-qPCR method as described by Falavigna et al., 2014.

## Sheet: Supp. Table 10
Supplementary Table 10. LOD thresholds calculated for the BBD QTL described in Supplementary Figure 6 for the parent "M13/91". LOD threshold values calculated for each year are indicated per linkage group (LG) and genome wide (GW) respectiveluy (LG/GW). nd = not determined.
M13/91	Year	2011	2012	2013	2014	2015	2016	2017	Mean
	Bento Gonçalves	5.8 / 5.8	6.5 / 8.1	5.1 / 5.7	5.8 / 6.3	5.9 / 6.2	5.8 / 8.8	5.8 / 6.6	5.5 / 6.4
	Vacaria	5.7 / 6.0	4.5 / 5.8	nd	5.4 / 8.1	5.2 / 6.4	nd	5.3 / 6.1	6.0 / 6.2
